# Supplementary material for: Enhanced electrocoagulation process for natural organic matter removal from surface drinking water sources: coagulant dose control & organic matter characteristics
Source: Royal Society of Chemistry journal article supplement (doi:10.1039/d2ew00376g), 2022-11-08
Supplement: d2ew00376g1.pdf [file d2ew00376g1.pdf]

## *Supplementary Information*

# **Enhanced-Electrocoagulation Process for Natural Organic Matter Removal from Surface Drinking Water Sources: Coagulant Dose Control & Organic Matter Characteristics**

Hiua Daraei,<sup>ae</sup> Parth D. Intwala,<sup>a</sup> Edoardo Bertone,<sup>b</sup> John Awad,<sup>ad</sup> Rodney A. Stewart,<sup>b</sup> Christopher W.K. Chow,<sup>a</sup> Jinming Duan<sup>ac</sup> and John van Leeuwen<sup>\*ac</sup>

<sup>a</sup>*Sustainable Infrastructure and Resource Management (SIRM), UniSA STEM, University of South Australia, Mawson Lakes, SA, Australia*

<sup>b</sup>*Griffith University, Gold Coast, QLD, Australia*

<sup>c</sup>*Future Industries Institute, Mawson Lakes, SA, Australia*

<sup>d</sup>*CSIRO Land and Water, Waite Campus, Urrbrae, SA, Australia*

<sup>e</sup>*Environmental Health Research Centre, Kurdistan University of Medical Sciences, Sanandaj, Kurdistan, Iran*

*\*Corresponding author: [John.vanleeuwen@unisa.edu.au](mailto:John.vanleeuwen@unisa.edu.au)*

- Number of Fig: 3 (Fig. S1 to Fig. S3)
- Number of Tables: 3 (tables S1 to S3)
- Number of Appendixes: 2 (Appendix I and Appendix II)

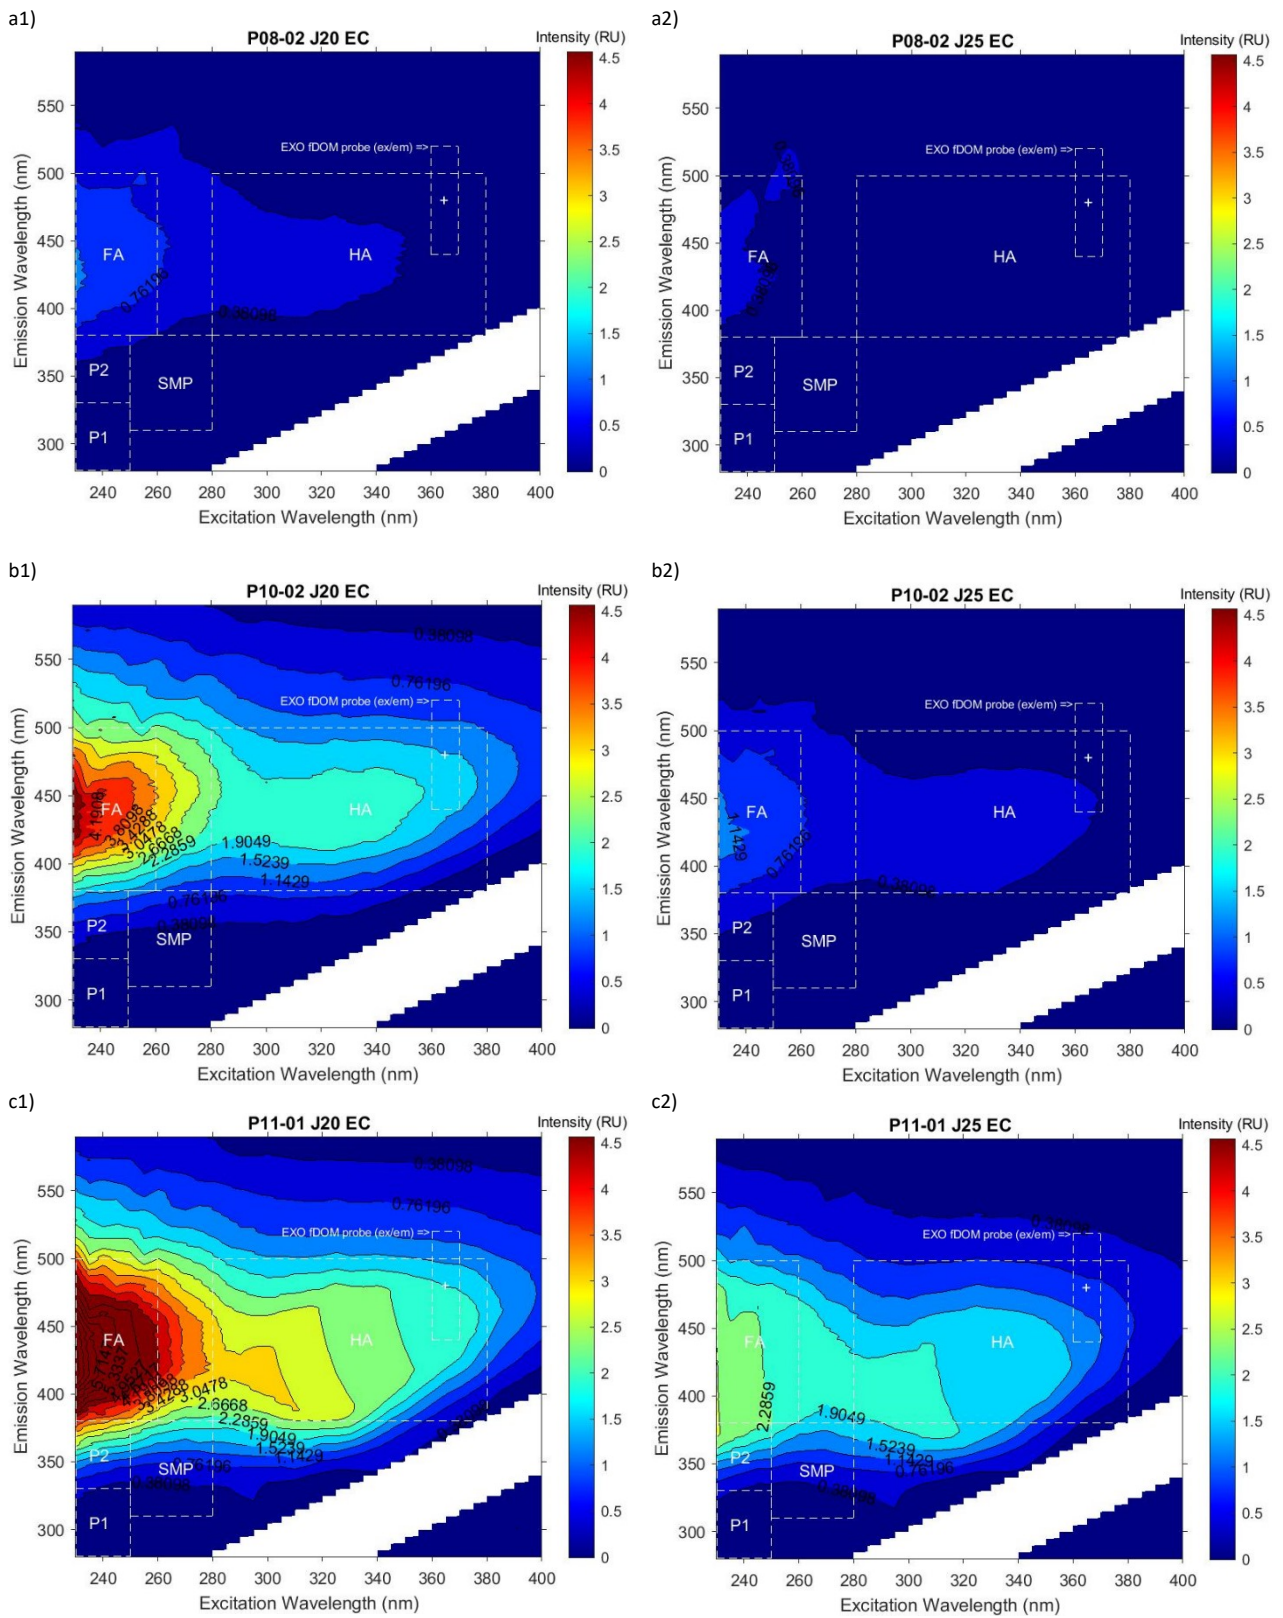

**Fig. S1a** Visualized *EEM* fluorescence spectra of (1) raw water sample, (2) a treated water sample, before and following *En-EC* in a) Murray River (*P08-02*), b) Myponga River (*P10-02*) and c) Middle River (*P11-01*) samples

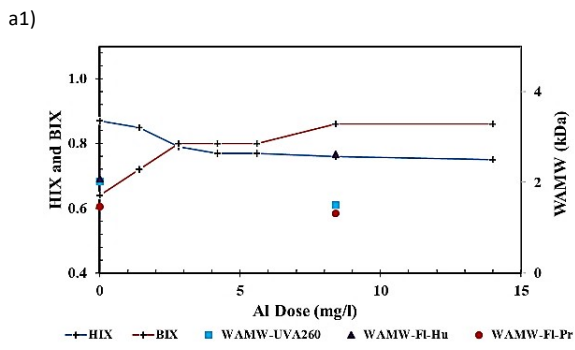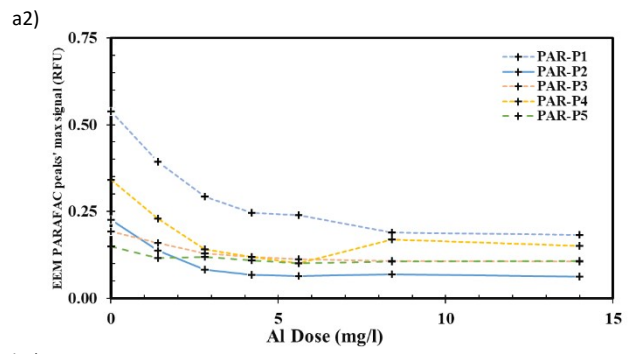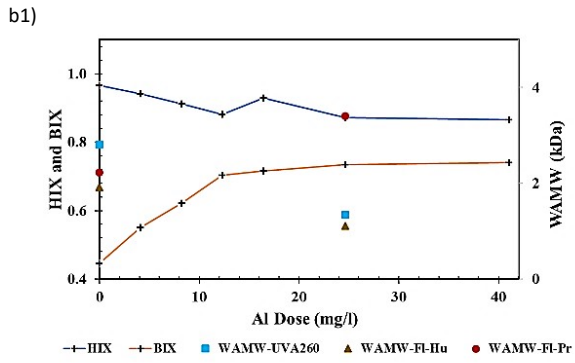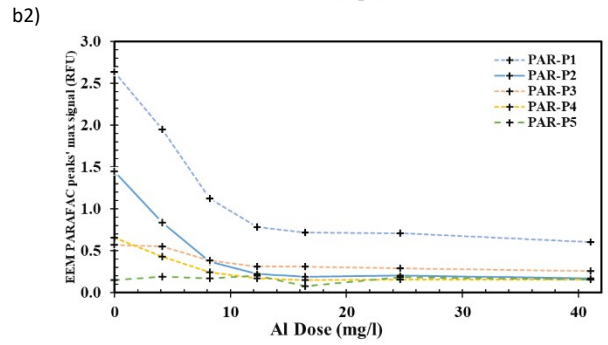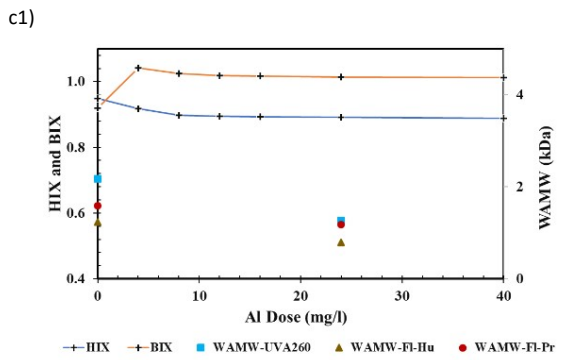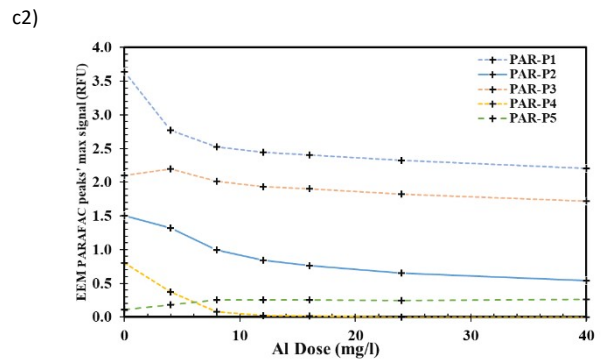

**Fig. S1b** *fEEM* based indices obtained through (1) *FRI* technique and (2) *PARAFAC* technique before and following *En-EC* in a) Murray River (*P08-02*), b) Myponga River (*P10-02*) and c) Middle River (*P11-01*) samples

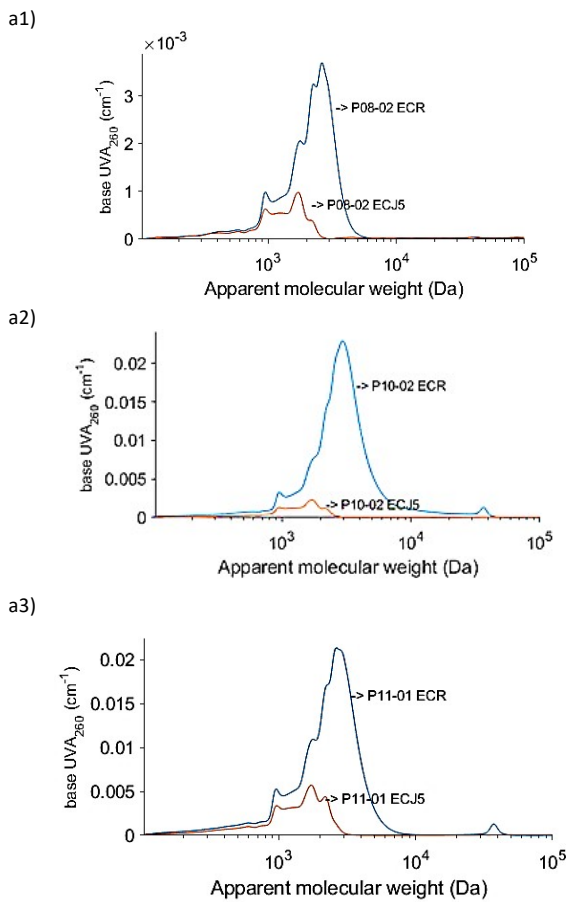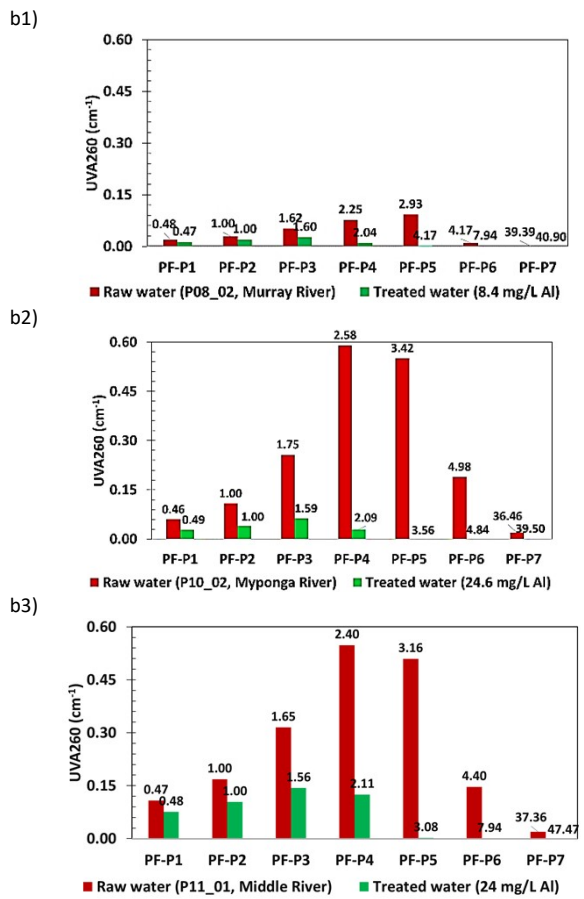

**Fig. S2a** The (1) *HPSEC-UVA<sub>260</sub>* based AMW profile before and following *En-EC*, (2) the *HPSEC-UVA<sub>260</sub>* based indices obtained through Peak-Fitting technique before and following *En-EC* in a) Murray River (P08-02), b) Myponga River (P10-02) and c) Middle River (P11-01) samples.  
\* The peak centres (*kDa*) are mentioned as labels to the columns

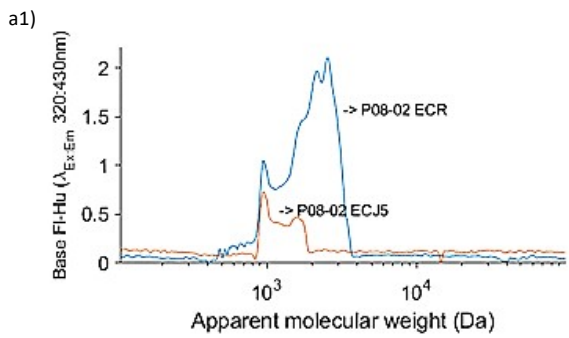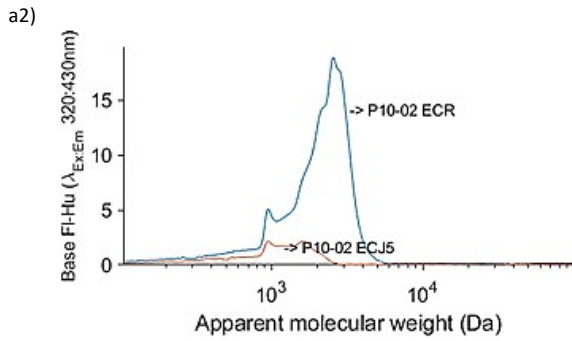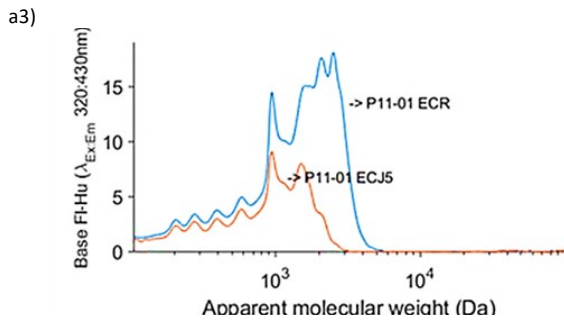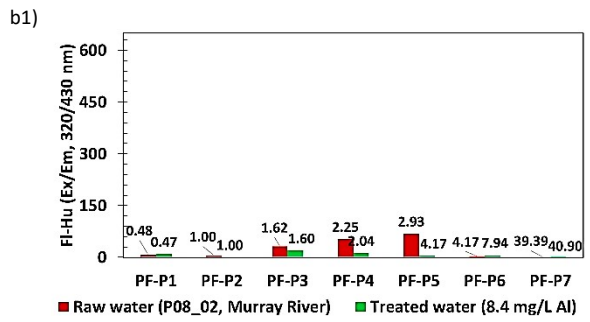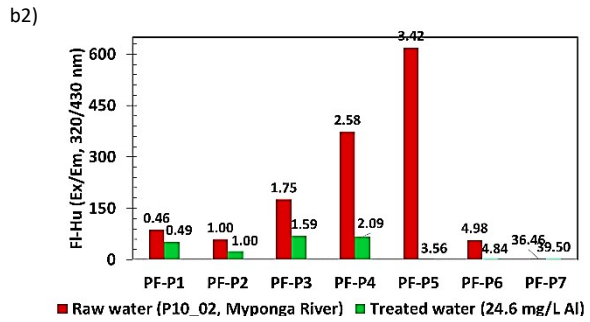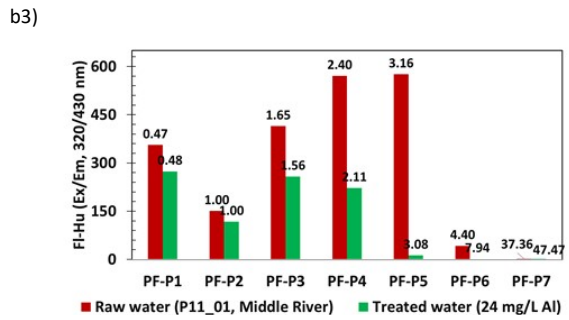

**Fig. S2b** The (1) HPSEC-FI-Hu based AMW profile before and following *En-EC*, (2) the HPSEC-FI-Hu based indices obtained through Peak-Fitting technique before and following *En-EC* in a) Murray River (P08-02), b) Myponga River (P10-02) and c) Middle River (P11-01) samples.

\* The peak centres (kDa) are mentioned as labels to the columns

**EC/Aluminum dose prediction/control based on DOC in raw water**

ARC\_LP 160100217  
2021 July  
H. Daraei PhD project

University of South Australia

**Enhanced Coagulation or %Coagulable-DOC Removal**  
\*Data Entry (Green Boxes Only)

|                        |      |
|------------------------|------|
| DOC mg L <sup>-1</sup> | 21.7 |
| Turbidity (NTU)        | 12.6 |

|                                                                                                      |        |
|------------------------------------------------------------------------------------------------------|--------|
| EC reactor active volume m <sup>3</sup>                                                              | 60.00  |
| Influent water flow rate m <sup>3</sup> /sec                                                         | 1.00   |
| EC reaction time/residence time (second)*                                                            | 60     |
| Active electrodic surface m <sup>2</sup>                                                             | 100.00 |
| Active electrodic surface per m <sup>3</sup> influent water (m <sup>2</sup> /second m <sup>3</sup> ) | 100.00 |

\*Equivalent to reactor active volume (m<sup>3</sup>) divided by influent water flow rate (m<sup>3</sup>/sec)

|                                         |       |
|-----------------------------------------|-------|
| Raw water pH                            | 8.0   |
| Raw water electric conductivity (EC) μs | 250.0 |

|                                                    |      |
|----------------------------------------------------|------|
| Alkalinity (CaCO <sub>3</sub> mg L <sup>-1</sup> ) | 23.0 |
|----------------------------------------------------|------|

|                                                                                                           |  |      |            |
|-----------------------------------------------------------------------------------------------------------|--|------|------------|
| Determination of alkalinity (CaCO <sub>3</sub> mg L <sup>-1</sup> )                                       |  | Data | Alkalinity |
| Alum, [Al <sub>2</sub> (SO <sub>4</sub> ) <sub>3</sub> ·18H <sub>2</sub> O]; mg L <sup>-1</sup> to pH 5.5 |  | 25   | 7          |

or

|                                             |      |     |
|---------------------------------------------|------|-----|
| Sulphuric Acid (Molarity)                   | 0.1  |     |
| Sulphuric Acid mL L <sup>-1</sup> to pH 5.5 | 10.0 | 117 |

or

|                                                 |      |     |
|-------------------------------------------------|------|-----|
| Hydrochloric Acid (Molarity)                    | 0.2  |     |
| Hydrochloric Acid, mL L <sup>-1</sup> to pH 5.5 | 10.0 | 117 |

|                         |  |
|-------------------------|--|
| %Coagulable-DOC Removal |  |
|-------------------------|--|

Enhanced Coagulation occurs at 89.3%\* (Default value is 89.3 or no entry)

|                       |  |
|-----------------------|--|
| Target Coagulation pH |  |
|-----------------------|--|

(Default value is 6.12 or no entry)

|                                                                     |                         |
|---------------------------------------------------------------------|-------------------------|
| Output Data                                                         |                         |
| Form of Coagulant                                                   | Dose mg L <sup>-1</sup> |
| Al                                                                  | 16.32                   |
| Al <sub>2</sub> O <sub>3</sub>                                      | 31.1                    |
| Al <sub>2</sub> (SO <sub>4</sub> ) <sub>3</sub>                     | 104                     |
| Al <sub>2</sub> (SO <sub>4</sub> ) <sub>3</sub> ·14H <sub>2</sub> O | 181                     |
| Al <sub>2</sub> (SO <sub>4</sub> ) <sub>3</sub> ·18H <sub>2</sub> O | 203                     |
| Al <sub>2</sub> (SO <sub>4</sub> ) <sub>3</sub> ·24H <sub>2</sub> O | 236                     |
| coulomb/L                                                           | 175.1                   |
| Current electricity/L (ampere/L)                                    | 2.92                    |
| Current density (ampere/m <sup>2</sup> )                            | 0.03                    |

|                             |     |
|-----------------------------|-----|
| Resultant pH from EC dosing | 8.0 |
|-----------------------------|-----|

EC dosing has negligible impacts on pH and alkalinity

|                                                              |       |
|--------------------------------------------------------------|-------|
| pH reagents for coagulation pH control (mg L <sup>-1</sup> ) |       |
| Sulphuric Acid                                               | 15.68 |
| Hydrochloric Acid                                            | 11.52 |
| NaOH                                                         |       |
| CaO Quick lime 85%                                           |       |
| Hydrated Lime 95%                                            |       |
| Soda Ash Na <sub>2</sub> CO <sub>3</sub>                     |       |
| Sodium bicarbonate NaHCO <sub>3</sub>                        |       |

|                       |  |
|-----------------------|--|
| Turbidity % weighting |  |
|-----------------------|--|

(Default value is 100 or no entry)

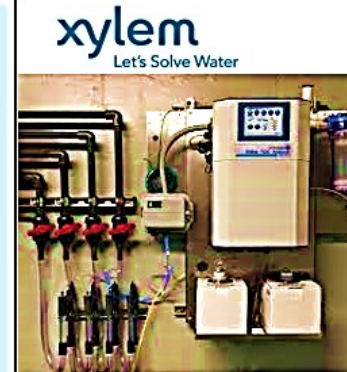

OI Analytical 9210p On-line TOC Analyzer

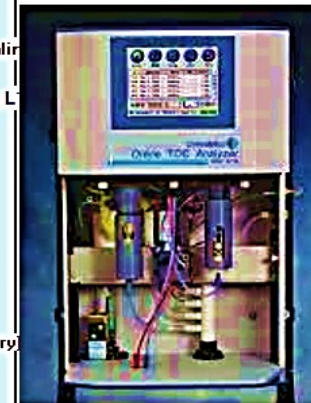

Fig. S3 A screenshot of the WTC-DOC-ECOag software

**Table S1** The data are available in the corresponding excel file which is submitted as supplementary information

**Table S2a** *fEEM* data-based indices for Murray River sample

|                                  | Raw sample   | Treated with Al dose ( $mg L^{-1}$ ) of: |       |       |       |              |       | Ratio <sup>1</sup> |
|----------------------------------|--------------|------------------------------------------|-------|-------|-------|--------------|-------|--------------------|
|                                  |              | 1.4                                      | 2.8   | 4.2   | 5.6   | 8.4          | 14    |                    |
| <b>P1<sup>1</sup></b>            | <b>5.20</b>  | 5.23                                     | 7.22  | 8.10  | 6.90  | <b>9.05</b>  | 8.25  | <b>0.6</b>         |
| <b>P2</b>                        | <b>18.25</b> | 18.54                                    | 19.83 | 20.51 | 19.97 | <b>20.40</b> | 20.74 | <b>0.9</b>         |
| <b>FA</b>                        | <b>48.28</b> | 47.89                                    | 44.44 | 42.65 | 43.87 | <b>44.10</b> | 43.14 | <b>1.1</b>         |
| <b>SMP</b>                       | <b>9.27</b>  | 9.92                                     | 11.27 | 11.80 | 11.80 | <b>10.91</b> | 12.03 | <b>0.8</b>         |
| <b>HA</b>                        | <b>19.00</b> | 18.41                                    | 17.25 | 16.94 | 17.46 | <b>15.54</b> | 15.84 | <b>1.2</b>         |
| <b>HIX<sup>2</sup></b>           | <b>0.89</b>  | 0.87                                     | 0.83  | 0.81  | 0.81  | <b>0.80</b>  | 0.80  | <b>1.1</b>         |
| <b>BIX<sup>3</sup></b>           | <b>0.64</b>  | 0.72                                     | 0.80  | 0.80  | 0.80  | <b>0.86</b>  | 0.86  | <b>0.7</b>         |
| <b>Peak T<sup>4</sup></b>        | <b>0.11</b>  | 0.08                                     | 0.07  | 0.07  | 0.05  | <b>0.06</b>  | 0.07  | <b>2.0</b>         |
| <b>Peak A<sup>5</sup></b>        | <b>0.83</b>  | 0.56                                     | 0.40  | 0.33  | 0.31  | <b>0.30</b>  | 0.29  | <b>2.8</b>         |
| <b>Peak M<sup>6</sup></b>        | <b>0.47</b>  | 0.35                                     | 0.25  | 0.22  | 0.21  | <b>0.21</b>  | 0.19  | <b>2.3</b>         |
| <b>Peak C<sup>7</sup></b>        | <b>0.50</b>  | 0.37                                     | 0.28  | 0.23  | 0.23  | <b>0.22</b>  | 0.20  | <b>2.3</b>         |
| <b>A:T<sup>8</sup></b>           | <b>7.66</b>  | 7.18                                     | 5.08  | 4.49  | 5.11  | <b>5.23</b>  | 4.44  | <b>1.5</b>         |
| <b>C:A<sup>9</sup></b>           | <b>0.51</b>  | 0.56                                     | 0.58  | 0.60  | 0.58  | <b>0.60</b>  | 0.63  | <b>0.8</b>         |
| <b>C:M<sup>10</sup></b>          | <b>1.21</b>  | 1.16                                     | 1.14  | 1.03  | 1.05  | <b>1.00</b>  | 1.06  | <b>1.2</b>         |
| <b>C:T<sup>11</sup></b>          | <b>3.87</b>  | 3.99                                     | 2.96  | 2.70  | 2.94  | <b>3.13</b>  | 2.81  | <b>1.2</b>         |
| <b>NI<sup>12</sup></b>           | <b>1.00</b>  | 1.00                                     | 1.00  | 1.00  | 1.00  | <b>1.00</b>  | 1.00  | <b>1.0</b>         |
| <b>EXO EXO fDOM<sup>13</sup></b> | <b>0.27</b>  | 0.18                                     | 0.12  | 0.10  | 0.10  | <b>0.09</b>  | 0.08  | <b>3.1</b>         |
| <b>PAR_P1<sup>14</sup></b>       | <b>0.28</b>  | 0.20                                     | 0.15  | 0.12  | 0.12  | <b>0.09</b>  | 0.09  | <b>3.1</b>         |
| <b>PAR_P2</b>                    | <b>0.21</b>  | 0.13                                     | 0.08  | 0.06  | 0.06  | <b>0.07</b>  | 0.06  | <b>2.9</b>         |
| <b>PAR_P3</b>                    | <b>0.10</b>  | 0.10                                     | 0.09  | 0.09  | 0.09  | <b>0.07</b>  | 0.08  | <b>1.4</b>         |
| <b>PAR_P4</b>                    | <b>0.23</b>  | 0.17                                     | 0.11  | 0.09  | 0.09  | <b>0.09</b>  | 0.07  | <b>2.6</b>         |
| <b>PAR_P5</b>                    | <b>0.39</b>  | 0.26                                     | 0.17  | 0.14  | 0.12  | <b>0.16</b>  | 0.15  | <b>2.4</b>         |

\*Weighted average percentage values for P1, P2, FA, SMP and HA indices.

<sup>1</sup>Ratio of the fluorescence index value in the raw sample to a sample treated with  $\geq$  EnD. <sup>2</sup>Humification index (HIX<sub>250nm</sub>): An indicator of humic substance content or extent of humification <sup>1</sup>; <sup>3</sup>Biological index (BIX): An indicator of autotrophic productivity where  $>1$  values correspond to recently produced DOM of autochthonous origin <sup>2</sup>; <sup>4</sup>Peak T: An indicator of tryptophan like portion of protein like compounds; <sup>5</sup>Peak A: An indicator of humic Like compounds.; <sup>6</sup>Peak M: An indicator of marine humic Like compounds; <sup>7</sup>Peak C: An indicator of Humic Like compounds <sup>3,8</sup>Peaks ratios (A:T): Indicator of the amount of humic-like (recalcitrant) vs. fresh\_like (labile) fluorescence <sup>4</sup>; <sup>9</sup>Peaks ratio (C:A): An indication of the amount of humic-like vs. fulvic-like compounds; <sup>10</sup>Peaks ratio (C:M): An indication of the amount of diagenetically altered (blue\_shifted) fluorescence in a sample <sup>5,6</sup>; <sup>11</sup>Peaks ratios (C:T): Indicator of the amount of humic-like (recalcitrant) vs. fresh\_like (labile) fluorescence <sup>4</sup>; <sup>12</sup>New index: Proposed to be an indicator for humification; <sup>13</sup>EEM\_fDOM: Is the normalized signal collected from benchtop machine output EEM spectra at the same ex-em paired wavelength which the EEM\_EXO\_fDOM probe use. <sup>14</sup>Peak 1: The decomposed (identified) EEM peak (component) area in the studied samples EEM spectra using PARFAC approach.



**Table S2b** *fEEM* data-based indices for Myponga River sample

|                                  | Raw sample   | Treated with Al dose (mg L <sup>-1</sup> ) at: |       |       |       |              |       | Ratio <sup>1</sup> |
|----------------------------------|--------------|------------------------------------------------|-------|-------|-------|--------------|-------|--------------------|
|                                  |              | 4.1                                            | 8.2   | 12.3  | 16.4  | 24.6         | 41.1  |                    |
| <b>P1*</b>                       | <b>1.08</b>  | 3.52                                           | 4.74  | 7.62  | 3.54  | <b>6.65</b>  | 7.00  | <b>0.6</b>         |
| <b>P2</b>                        | <b>11.67</b> | 15.85                                          | 17.74 | 19.80 | 20.64 | <b>19.92</b> | 20.30 | <b>0.8</b>         |
| <b>FA</b>                        | <b>56.67</b> | 49.88                                          | 47.10 | 43.42 | 46.21 | <b>43.47</b> | 43.03 | <b>1.2</b>         |
| <b>SMP</b>                       | <b>5.82</b>  | 7.44                                           | 9.02  | 10.23 | 9.28  | <b>10.49</b> | 10.54 | <b>0.8</b>         |
| <b>HA</b>                        | <b>24.77</b> | 23.31                                          | 21.39 | 18.94 | 20.33 | <b>19.48</b> | 19.12 | <b>1.1</b>         |
| <b>HIX<sup>2</sup></b>           | <b>0.97</b>  | 0.94                                           | 0.91  | 0.88  | 0.93  | <b>0.87</b>  | 0.87  | <b>1.1</b>         |
| <b>BIX<sup>3</sup></b>           | <b>0.45</b>  | 0.55                                           | 0.62  | 0.70  | 0.72  | <b>0.74</b>  | 0.74  | <b>0.7</b>         |
| <b>Peak T<sup>4</sup></b>        | <b>0.20</b>  | 0.23                                           | 0.19  | 0.18  | 0.15  | <b>0.17</b>  | 0.13  | <b>2.1</b>         |
| <b>Peak A<sup>5</sup></b>        | <b>3.51</b>  | 2.36                                           | 1.30  | 0.90  | 0.82  | <b>0.82</b>  | 0.69  | <b>3.8</b>         |
| <b>Peak M<sup>6</sup></b>        | <b>1.85</b>  | 1.44                                           | 0.86  | 0.61  | 0.57  | <b>0.54</b>  | 0.48  | <b>3.2</b>         |
| <b>Peak C<sup>7</sup></b>        | <b>2.25</b>  | 1.69                                           | 0.98  | 0.71  | 0.64  | <b>0.63</b>  | 0.54  | <b>3.1</b>         |
| <b>A:T<sup>8</sup></b>           | <b>17.23</b> | 10.09                                          | 6.57  | 4.75  | 6.28  | <b>5.23</b>  | 4.84  | <b>1.8</b>         |
| <b>C:A<sup>9</sup></b>           | <b>0.61</b>  | 0.67                                           | 0.70  | 0.69  | 0.69  | <b>0.68</b>  | 0.69  | <b>0.9</b>         |
| <b>C:M<sup>10</sup></b>          | <b>1.82</b>  | 1.59                                           | 1.41  | 1.29  | 1.27  | <b>1.30</b>  | 1.25  | <b>1.1</b>         |
| <b>C:T<sup>11</sup></b>          | <b>10.59</b> | 6.77                                           | 4.61  | 3.28  | 4.31  | <b>3.55</b>  | 3.34  | <b>1.6</b>         |
| <b>NI<sup>12</sup></b>           | <b>4.00</b>  | 2.62                                           | 1.59  | 1.15  | 1.06  | <b>1.06</b>  | 1.00  | <b>3.5</b>         |
| <b>EEM_EXO_fDOM<sup>13</sup></b> | <b>1.53</b>  | 0.99                                           | 0.49  | 0.32  | 0.28  | <b>0.29</b>  | 0.24  | <b>3.8</b>         |
| <b>PAR_P1<sup>14</sup></b>       | <b>1.65</b>  | 1.20                                           | 0.65  | 0.45  | 0.40  | <b>0.41</b>  | 0.34  | <b>4.1</b>         |
| <b>PAR_P2</b>                    | <b>1.32</b>  | 0.74                                           | 0.32  | 0.19  | 0.16  | <b>0.17</b>  | 0.15  | <b>7.6</b>         |
| <b>PAR_P3</b>                    | <b>0.23</b>  | 0.34                                           | 0.26  | 0.24  | 0.23  | <b>0.23</b>  | 0.20  | <b>1.0</b>         |
| <b>PAR_P4</b>                    | <b>0.97</b>  | 0.68                                           | 0.40  | 0.26  | 0.26  | <b>0.23</b>  | 0.20  | <b>4.2</b>         |
| <b>PAR_P5</b>                    | <b>0.94</b>  | 0.62                                           | 0.34  | 0.24  | 0.20  | <b>0.22</b>  | 0.20  | <b>4.3</b>         |

\*Weighted average percentage values for P1, P2, FA, SMP and HA indices.

<sup>1</sup>Ratio of the fluorescence index value in the raw sample to a sample treated with  $\geq$  EnD. <sup>2</sup>Humification index (HIX<sub>250nm</sub>): An indicator of humic substance content or extent of humification <sup>1</sup>; <sup>3</sup>Biological index (BIX): An indicator of autotrophic productivity where  $>1$  values correspond to recently produced DOM of autochthonous origin <sup>2</sup>); <sup>4</sup>Peak T: An indicator of tryptophan like portion of protein like compounds; <sup>5</sup>Peak A: An indicator of humic Like compounds.; <sup>6</sup>Peak M: An indicator of marine humic Like compounds; <sup>7</sup>Peak C: An indicator of Humic Like compounds <sup>3,8</sup>Peaks ratios (A:T): Indicator of the amount of humic-like (recalcitrant) vs. fresh\_like (labile) fluorescence <sup>4</sup>); <sup>9</sup>Peaks ratio (C:A): An indication of the amount of humic-like vs. fulvic-like compounds; <sup>10</sup>Peaks ratio (C:M): An indication of the amount of diagenetically altered (blue shifted) fluorescence in a sample <sup>5,6</sup>; <sup>11</sup>Peaks ratios (C:T): Indicator of the amount of humic-like (recalcitrant) vs. fresh\_like (labile) fluorescence <sup>4</sup>); <sup>12</sup>New index: Proposed to be an indicator for humification; <sup>13</sup>EEM\_fDOM: Is the normalized signal collected from benchtop machine output EEM spectra at the same ex-em paired wavelength which the EEM\_EXO\_fDOM probe use. <sup>14</sup>Peak 1: The decomposed (identified) EEM peak (component) area in the studied samples EEM spectra using PARFAC approach.

**Table S2c** *fEEM* data-based indices for Middle River sample

|                                  | Raw sample   | Treated with Al dose (mg L <sup>-1</sup> ) of: |       |       |       |              |       | Ratio <sup>1</sup> |
|----------------------------------|--------------|------------------------------------------------|-------|-------|-------|--------------|-------|--------------------|
|                                  |              | 4                                              | 8     | 12    | 16    | 24           | 40    |                    |
| <b>P1*</b>                       | <b>1.52</b>  | 2.28                                           | 2.55  | 2.61  | 2.84  | <b>2.99</b>  | 3.27  | <b>0.8</b>         |
| <b>P2</b>                        | <b>20.62</b> | 23.75                                          | 24.82 | 25.39 | 25.30 | <b>25.82</b> | 25.46 | <b>0.9</b>         |
| <b>FA</b>                        | <b>54.12</b> | 46.96                                          | 43.92 | 42.38 | 42.43 | <b>40.97</b> | 40.58 | <b>1.1</b>         |
| <b>SMP</b>                       | <b>6.84</b>  | 9.16                                           | 10.34 | 10.80 | 10.83 | <b>11.18</b> | 11.40 | <b>0.8</b>         |
| <b>HA</b>                        | <b>16.90</b> | 17.85                                          | 18.37 | 18.81 | 18.60 | <b>19.03</b> | 19.30 | <b>0.9</b>         |
| <b>HIX<sup>2</sup></b>           | <b>0.95</b>  | 0.92                                           | 0.90  | 0.89  | 0.89  | <b>0.89</b>  | 0.89  | <b>1.0</b>         |
| <b>BIX<sup>3</sup></b>           | <b>0.92</b>  | 1.04                                           | 1.02  | 1.02  | 1.02  | <b>1.01</b>  | 1.01  | <b>1.0</b>         |
| <b>Peak T<sup>4</sup></b>        | <b>0.56</b>  | 0.59                                           | 0.60  | 0.59  | 0.56  | <b>0.57</b>  | 0.55  | <b>1.0</b>         |
| <b>Peak A<sup>5</sup></b>        | <b>4.65</b>  | 3.12                                           | 2.52  | 2.35  | 2.31  | <b>2.22</b>  | 2.15  | <b>1.4</b>         |
| <b>Peak M<sup>6</sup></b>        | <b>3.24</b>  | 2.58                                           | 2.22  | 2.11  | 2.09  | <b>2.02</b>  | 1.96  | <b>1.3</b>         |
| <b>Peak C<sup>7</sup></b>        | <b>2.74</b>  | 2.18                                           | 1.98  | 1.92  | 1.91  | <b>1.87</b>  | 1.85  | <b>1.2</b>         |
| <b>A:T<sup>8</sup></b>           | <b>9.47</b>  | 5.49                                           | 4.60  | 4.35  | 4.26  | <b>4.29</b>  | 4.27  | <b>1.3</b>         |
| <b>C:A<sup>9</sup></b>           | <b>0.52</b>  | 0.67                                           | 0.76  | 0.79  | 0.80  | <b>0.82</b>  | 0.86  | <b>0.8</b>         |
| <b>C:M<sup>10</sup></b>          | <b>0.85</b>  | 0.83                                           | 0.89  | 0.90  | 0.91  | <b>0.92</b>  | 0.93  | <b>0.9</b>         |
| <b>C:T<sup>11</sup></b>          | <b>4.96</b>  | 3.65                                           | 3.50  | 3.44  | 3.42  | <b>3.53</b>  | 3.65  | <b>1.0</b>         |
| <b>NI<sup>12</sup></b>           | <b>5.21</b>  | 3.36                                           | 2.65  | 2.46  | 2.40  | <b>2.29</b>  | 2.21  | <b>1.5</b>         |
| <b>EEM_EXO_fDOM<sup>13</sup></b> | <b>1.88</b>  | 1.52                                           | 1.18  | 1.03  | 0.96  | <b>0.87</b>  | 0.76  | <b>1.8</b>         |
| <b>PAR_P1<sup>14</sup></b>       | <b>2.19</b>  | 1.93                                           | 1.75  | 1.64  | 1.57  | <b>1.45</b>  | 1.27  | <b>1.5</b>         |
| <b>PAR_P2</b>                    | <b>1.27</b>  | 1.02                                           | 0.72  | 0.60  | 0.54  | <b>0.46</b>  | 0.40  | <b>2.8</b>         |
| <b>PAR_P3</b>                    | <b>1.80</b>  | 2.34                                           | 2.22  | 2.11  | 2.04  | <b>1.91</b>  | 1.72  | <b>0.9</b>         |
| <b>PAR_P4</b>                    | <b>0.89</b>  | -0.14                                          | -0.18 | -0.10 | -0.01 | <b>0.12</b>  | 0.32  | <b>7.6</b>         |
| <b>PAR_P5</b>                    | <b>1.07</b>  | 0.55                                           | 0.25  | 0.19  | 0.18  | <b>0.15</b>  | 0.14  | <b>7.1</b>         |

\*Weighted average percentage values for P1, P2, FA, SMP and HA indices.

<sup>1</sup>Ratio of the fluorescence index value in the raw sample to a sample treated with  $\geq$  EnD. <sup>2</sup>Humification index (HIX<sub>250nm</sub>): An indicator of humic substance content or extent of humification <sup>1</sup>; <sup>3</sup>Biological index (BIX): An indicator of autotrophic productivity where  $>1$  values correspond to recently produced DOM of autochthonous origin <sup>2</sup>); <sup>4</sup>Peak T: An indicator of tryptophan like portion of protein like compounds; <sup>5</sup>Peak A: An indicator of humic Like compounds.; <sup>6</sup>Peak M: An indicator of marine humic Like compounds; <sup>7</sup>Peak C: An indicator of Humic Like compounds <sup>3,8</sup>Peaks ratios (A:T): Indicator of the amount of humic-like (recalcitrant) vs. fresh\_like (labile) fluorescence <sup>4</sup>); <sup>9</sup>Peaks ratio (C:A): An indication of the amount of humic-like vs. fulvic-like compounds; <sup>10</sup>Peaks ratio (C:M): An indication of the amount of diagenetically altered (blue shifted) fluorescence in a sample <sup>5,6</sup>; <sup>11</sup>Peaks ratios (C:T): Indicator of the amount of humic-like (recalcitrant) vs. fresh\_like (labile) fluorescence <sup>4</sup>); <sup>12</sup>New index: Proposed to be an indicator for humification; <sup>13</sup>EEM\_EXO\_fDOM: Is the normalized signal collected from benchtop machine output EEM spectra at the same ex-em paired wavelength which the EXO\_fDOM probe use. <sup>14</sup>Peak 1: The decomposed (identified) EEM peak (component) area in the studied samples EEM spectra using PARFAC approach.

**Table S3a** HPSEC-UVA<sub>260</sub> data-based indices for Murray River, Myponga River and Middle River samples

|                         | Murray River |         |                    | Myponga River |         |                    | Middle River |         |                    |
|-------------------------|--------------|---------|--------------------|---------------|---------|--------------------|--------------|---------|--------------------|
|                         | Raw          | Treated | Ratio <sup>1</sup> | Raw           | Treated | Ratio <sup>1</sup> | Raw          | Treated | Ratio <sup>1</sup> |
| <b>WAMW<sup>2</sup></b> | 2.02         | 1.50    | <b>1.3</b>         | 2.81          | 1.34    | <b>2.1</b>         | 2.17         | 1.27    | <b>1.7</b>         |
| <b>PF-P1</b>            | 0.0191       | 0.0126  | <b>1.5</b>         | 0.0594        | 0.0274  | <b>2.2</b>         | 0.1081       | 0.0756  | <b>1.4</b>         |
| <b>PF-P2</b>            | 0.0295       | 0.0199  | <b>1.5</b>         | 0.1079        | 0.0409  | <b>2.6</b>         | 0.1685       | 0.1040  | <b>1.6</b>         |
| <b>PF-P3</b>            | 0.0518       | 0.0261  | <b>2.0</b>         | 0.2569        | 0.0622  | <b>4.1</b>         | 0.3150       | 0.1433  | <b>2.2</b>         |
| <b>PF-P4</b>            | 0.0765       | 0.0093  | <b>8.2</b>         | 0.5902        | 0.0298  | <b>19.8</b>        | 0.5483       | 0.1250  | <b>4.4</b>         |
| <b>PF-P5</b>            | 0.0922       | 0.0013  | <b>72.7</b>        | 0.5505        | 0.0001  | <b>9875</b>        | 0.5095       | 0.0021  | <b>244</b>         |
| <b>PF-P6</b>            | 0.0098       | 0.0009  | <b>10.8</b>        | 0.1893        | 0.0012  | <b>156</b>         | 0.1467       | 0.0002  | <b>668</b>         |
| <b>PF-P7</b>            | 0.0007       | 0.0009  | <b>0.8</b>         | 0.0200        | 0.0008  | <b>26.3</b>        | 0.0191       | 0.0013  | <b>14.2</b>        |

**Table S3b** HPSEC-FI-Hu data-based indices for Murray River, Myponga River and Middle River samples

|                                | Murray River |                |                                 | Myponga River |                |                                 | Middle River |                |                                 |
|--------------------------------|--------------|----------------|---------------------------------|---------------|----------------|---------------------------------|--------------|----------------|---------------------------------|
|                                | <i>Raw</i>   | <i>Treated</i> | <b><i>Ratio</i><sup>1</sup></b> | <i>Raw</i>    | <i>Treated</i> | <b><i>Ratio</i><sup>1</sup></b> | <i>Raw</i>   | <i>Treated</i> | <b><i>Ratio</i><sup>1</sup></b> |
| <b><i>WAMW</i><sup>2</sup></b> | 2.0          | 1.9            | <b>1.1</b>                      | 2.4           | 1.1            | <b>2.3</b>                      | 1.2          | 0.8            | <b>1.6</b>                      |
| <b><i>PF-P1</i></b>            | 7.3          | 10.1           | <b>0.7</b>                      | 86.8          | 51.5           | <b>1.7</b>                      | 355.9        | 273.9          | <b>1.3</b>                      |
| <b><i>PF-P2</i></b>            | 5.3          | 0.8            | <b>6.8</b>                      | 58.7          | 25.5           | <b>2.3</b>                      | 150.6        | 117.5          | <b>1.3</b>                      |
| <b><i>PF-P3</i></b>            | 31.7         | 20.1           | <b>1.6</b>                      | 175.4         | 68.8           | <b>2.6</b>                      | 414.6        | 258.2          | <b>1.6</b>                      |
| <b><i>PF-P4</i></b>            | 53.2         | 12.9           | <b>4.1</b>                      | 373.0         | 66.9           | <b>5.6</b>                      | 571.0        | 222.1          | <b>2.6</b>                      |
| <b><i>PF-P5</i></b>            | 68.9         | 5.1            | <b>13.6</b>                     | 618.9         | 3.5            | <b>178.2</b>                    | 576.1        | 12.5           | <b>46.0</b>                     |
| <b><i>PF-P6</i></b>            | 3.6          | 5.2            | <b>0.7</b>                      | 57.6          | 2.2            | <b>26.6</b>                     | 42.3         | 1.7            | <b>25.7</b>                     |
| <b><i>PF-P7</i></b>            | 1.6          | 2.6            | <b>0.6</b>                      | 3.1           | 2.3            | <b>1.4</b>                      | 1.7          | 2.1            | <b>0.8</b>                      |

## Appendix 1

The EEM fluorescence data were pre-processed, including removing/smoothing Raman scattering, converting to Raman units, and limiting inner filter effects. The EEM spectra were standardized to Raman units (normalized to the integral of the Raman signal between 390 and 410 nm in emission at a fixed excitation of 350 nm) using Milli-Q water sample EEM spectra which are collected the same day as the samples.<sup>7</sup> The EEM data were then normalized to prevent the impact of DOM content variation on the output model.

The PARAFAC analyses of the fluorescence data were performed using 'decomposition routines for Emission-Excitation Matrices' (*drEEM Version\_0.6.5*, which is developed by Murphy, *et al.* (2013)) MATLAB software's toolbox. Several PARAFAC models (2- to 7-component PARAFAC models) were developed by analysing all EEM fluorescence measurements (n=200) of the raw and treated water samples collected from 3 EC and 17 CC jar tests as well as several other surface water sources' samples collected between Oct 2018 to Feb 2022. No outlier data were identified/excluded in the dataset using outlier tests and leverage plots (see Fig. A1.1). The 5-component model was selected on the basis of several criteria in turn. Fig. A1.2 shows that the addition of 6<sup>th</sup> and more fluorescence components has no noticeable impact on fitting error of PARAFAC models. In addition, the result of split validation technique, suggested by Murphy, *et al.* (2013) (which is performed using 'split-validation' function in *drEEM* toolbox) indicated 'Validated for all comparisons as Overall Result' in the case of six splits validation test trials of the 5-components model (where this was unsuccessful for models with larger number of components). The results of the comparison between validation datasets obtained through different combinations of the dataset splits are presented in Fig A1.3a&b.

The potential sources and functions of the identified PARAFAC component in the 5-component (hereafter referred to as fluorophores PAR-C1 to PAR-C5) PARAFAC model (Fig. A1.4) are presented in Table A1.1. These are attained through comparisons of the PARAFAC fluorescence components which are identified in the current study to the components reported in the literature. The comparison was performed using an online spectral library referred to as OpenFluor database<sup>9,10</sup> This showed that all components have been previously identified/reported frequently as DOM components (Tucker congruence coefficient  $\geq 0.95$  on both the excitation and emission spectra, OpenFluor references in Table A1.1). As summarised in Table A1.1, humic-like components PAR-C1, PAR-C2 and PAR-C4 are among the most common fluorophores found in freshwaters (large number of matches in OpenFluor database library, Table A1.1) and are associated with high-molecular-weight and aromatic compounds of terrestrial origin<sup>11</sup>. PAR-C3 and PAR-C5 components are classified as microbial protein-like components related to the production of DOM within aquatic ecosystems (see Table A1.1).

**Table A1.1** Interpretation of the EEM fluorescent components identified through PARAFAC analysis

| Component                                                                                                                        | Peak position ( $\lambda_{ex}/\lambda_{em}$ ) | % Contribution to the model | No. matches in OpenFluor ( $TCC_{ex} > 0.95$ and $TCC_{em} > 0.95$ ) | Traditional Classification | Possible source (Previous attributions) | ID in OpenFluor | References (Top matches)          | Common components in between models (Our model => Ref model) | Sample studied in the reference                                                                                                                                                                                                                                              |
|----------------------------------------------------------------------------------------------------------------------------------|-----------------------------------------------|-----------------------------|----------------------------------------------------------------------|----------------------------|-----------------------------------------|-----------------|-----------------------------------|--------------------------------------------------------------|------------------------------------------------------------------------------------------------------------------------------------------------------------------------------------------------------------------------------------------------------------------------------|
| PAR_P1                                                                                                                           | 325/424                                       | 48                          | 68                                                                   | Peak A/Peak C              | Humic-like Terrestrial delivered OM     | 44              | Shutova, <i>et al.</i> (2014)     | 1=>2; 2=>1; 3=>3; 4=>4;                                      | Raw and treated water of Capalaba WTP (QLD) South Maclean WTP (QLD); Grahamstown WTP (NSW); Gresford WTP (NSW) Yarra Glen WTP (VIC) are collected between October 2011 and September 2012                                                                                    |
| PAR_P2                                                                                                                           | 370/487                                       | 23                          | 90                                                                   | Peak A/Peak C              | Humic-like Terrestrial delivered OM     | 692             | Osburn, <i>et al.</i> (2017)      | 1=>2; 2=>1; 3=>4; 4=>3; 5=>5;                                | Arctic lakes located in three clusters across south-west (SW) Greenland                                                                                                                                                                                                      |
| PAR_P3                                                                                                                           | 305/379.5                                     | 14                          | 23                                                                   | Peak T                     | Protein-like Microbial delivered        | 2617            | Groeneveld, <i>et al.</i> (2020)  | 1=>2; 2=>3; 3=>4; 4=>1; 5=>5;                                | 20 lakes, three peats and seven streams and rivers throughout Sweden are collected between 28 August and 6 September 2016                                                                                                                                                    |
| PAR_P4                                                                                                                           | 325/423                                       | 13                          | 35                                                                   | Peak A/Peak C              | Humic-like Processed OM                 | 7               | Graeber, <i>et al.</i> (2012)     | 1=>1; 2=>2; 3=>5; 4=>4; 5=>7;                                | Central European headwater streams                                                                                                                                                                                                                                           |
| PAR_P5                                                                                                                           | 270/314                                       | 2                           | 64                                                                   | Peak T                     | Protein-like Microbial delivered        | 58              | Walker, <i>et al.</i> (2009)      | 1=>1; 2=>3; 3=>4; 4=>2; 5=>5;                                | Coastal Canadian Arctic surface waters                                                                                                                                                                                                                                       |
| *The components with red text are identified with Tucker congruence coefficient < 0.95 on the excitation or/and emission spectra |                                               |                             |                                                                      |                            |                                         | 14              | Lambert, <i>et al.</i> (2016)     | 1=>1; 2=>2; 3=>3; 4=>4;                                      | Zambezi River samples are collected during wet season 2012 (1 February to 5 May, n = 40), wet season 2013 (6 January to 21 March, n = 41), and dry season 2013 (15 October to 28 November, n = 24);                                                                          |
|                                                                                                                                  |                                               |                             |                                                                      |                            |                                         | 3630            | Wang, <i>et al.</i> (2020)        | 1=>1; 2=>2; 3=>3; 4=>4;                                      | 314 surface water samples are collected from 111 New York Lakes over the 2018 and 2019                                                                                                                                                                                       |
|                                                                                                                                  |                                               |                             |                                                                      |                            |                                         | 4353            | Wauthy, <i>et al.</i> (2018)      | 1=>1; 2=>2; 3=>4; 4=>3; 5=>5;                                | 356 freshwaters samples from 253 ponds are located in the regions span over a wide geographic area, covering around 200 degrees of longitude (from Alaska to Russia) and 30 degrees of latitude (from Subarctic to High Arctic) during the summer periods from 2002 to 2016. |
|                                                                                                                                  |                                               |                             |                                                                      |                            |                                         | 464             | Peleato, <i>et al.</i> (2016) 464 | 1=>1; 2=>2; 3=>4; 4=>3;                                      | The Otonabee River, Peterborough, Ontario                                                                                                                                                                                                                                    |

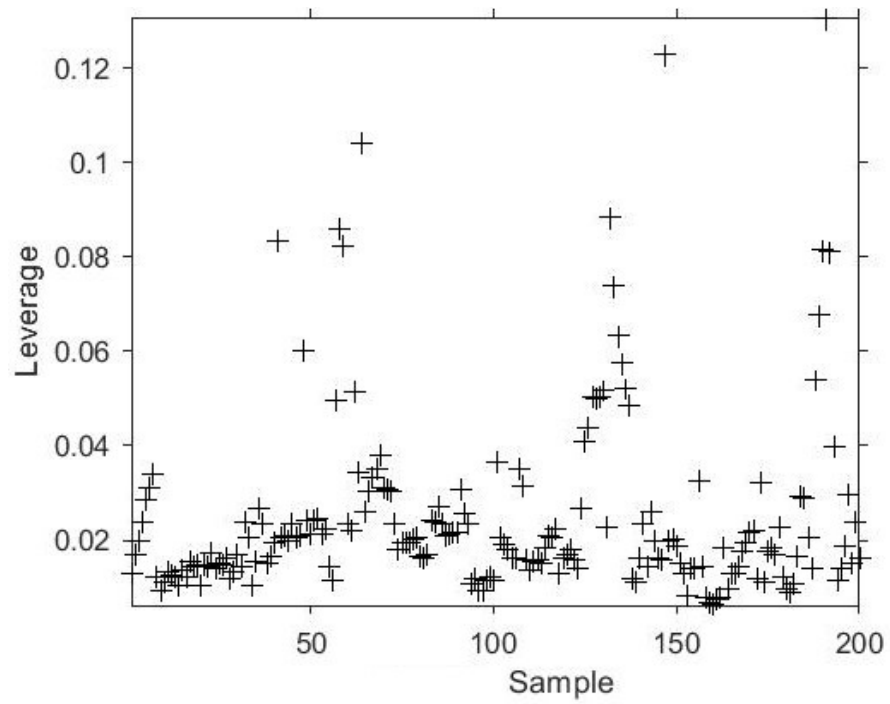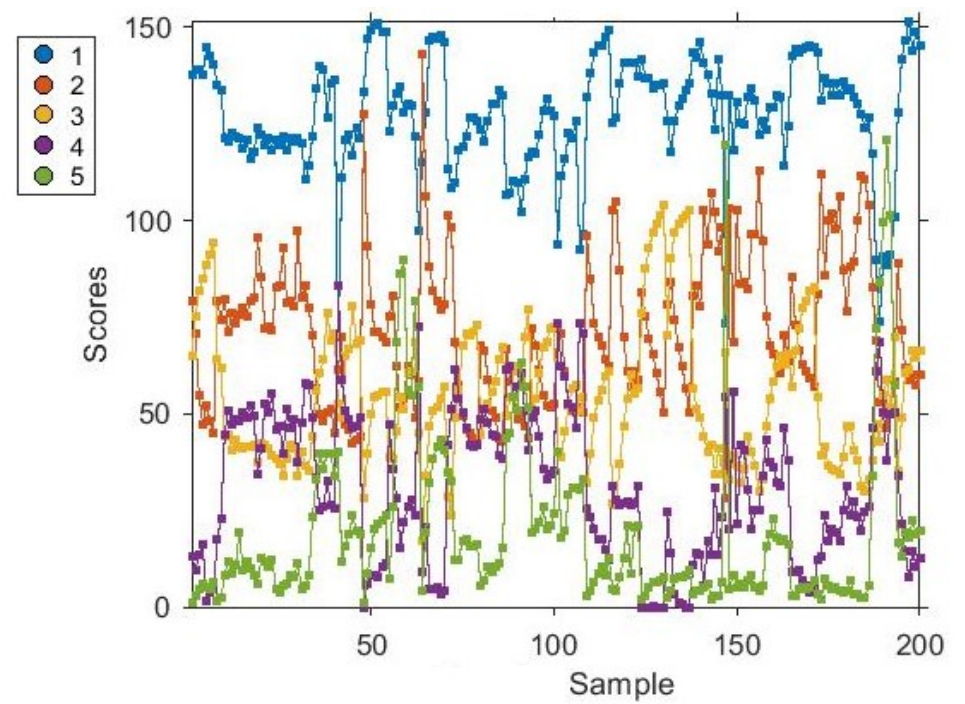

Fig. A1.1 Leverage and score graph of the 5-component mode for all studied samples

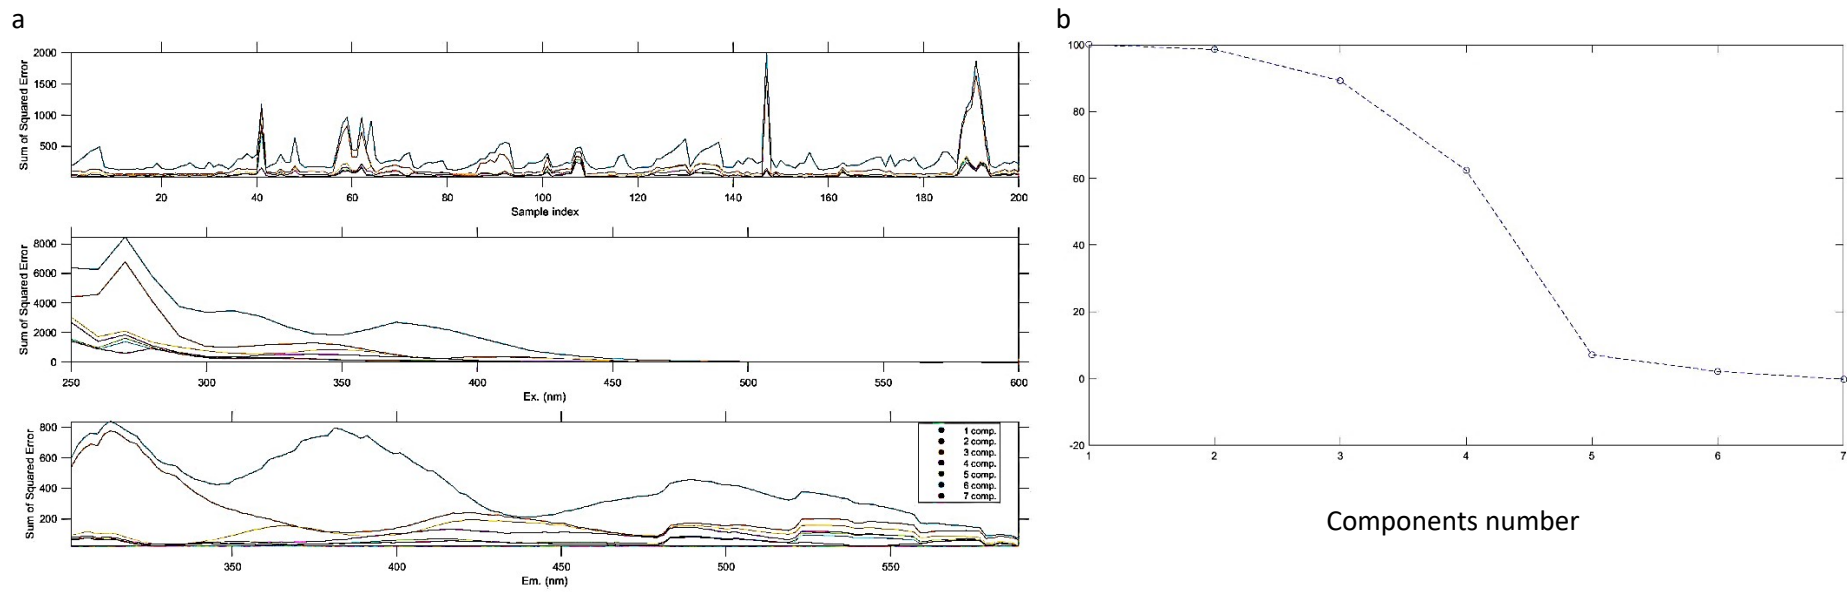

**Fig. A1.2** Fitting error in PARAFAC models with increasing number of fluorescence components (in the 1-component to 7-component models) in **a**) the range of studied ex/em wavelengths & samples and **b**) overall studied range of samples and ex/em wavelengths (accumulative error)



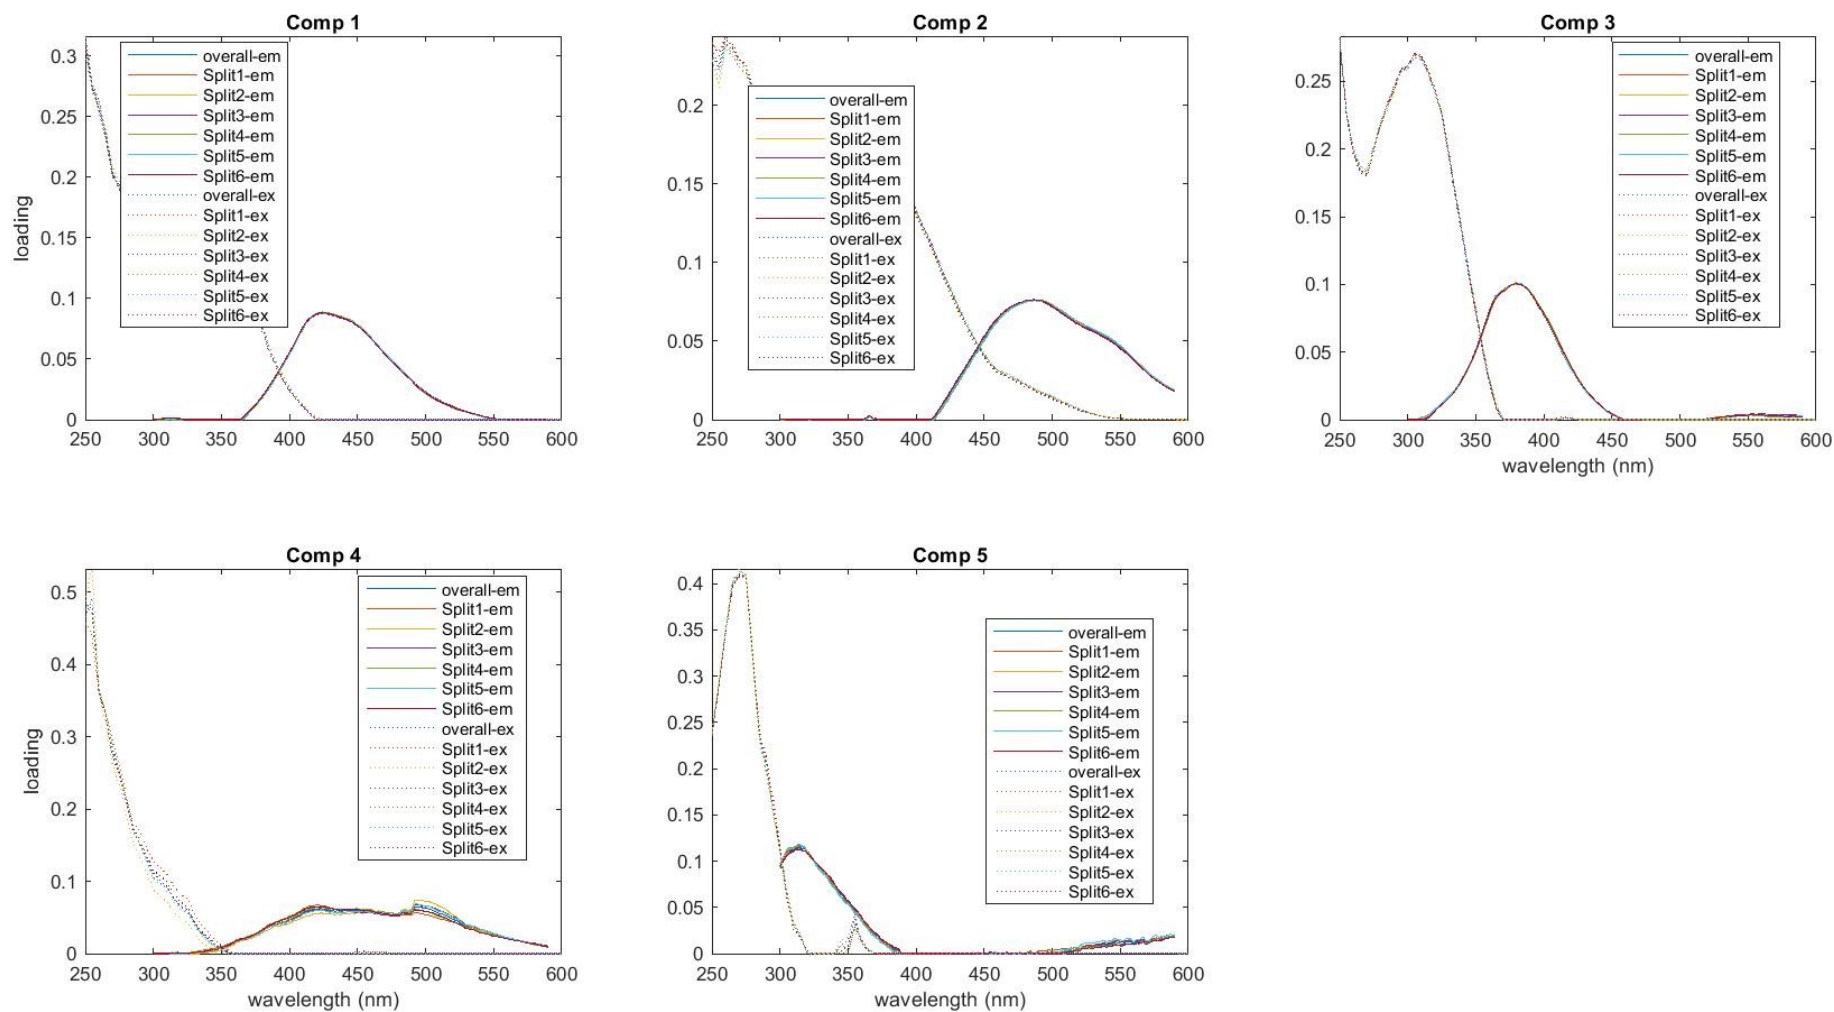

**Fig. A1.3a** Comparison of the dataset's in six splits for each identified fluorescence components. This indicating similarity of the identified components in all six splits datasets.

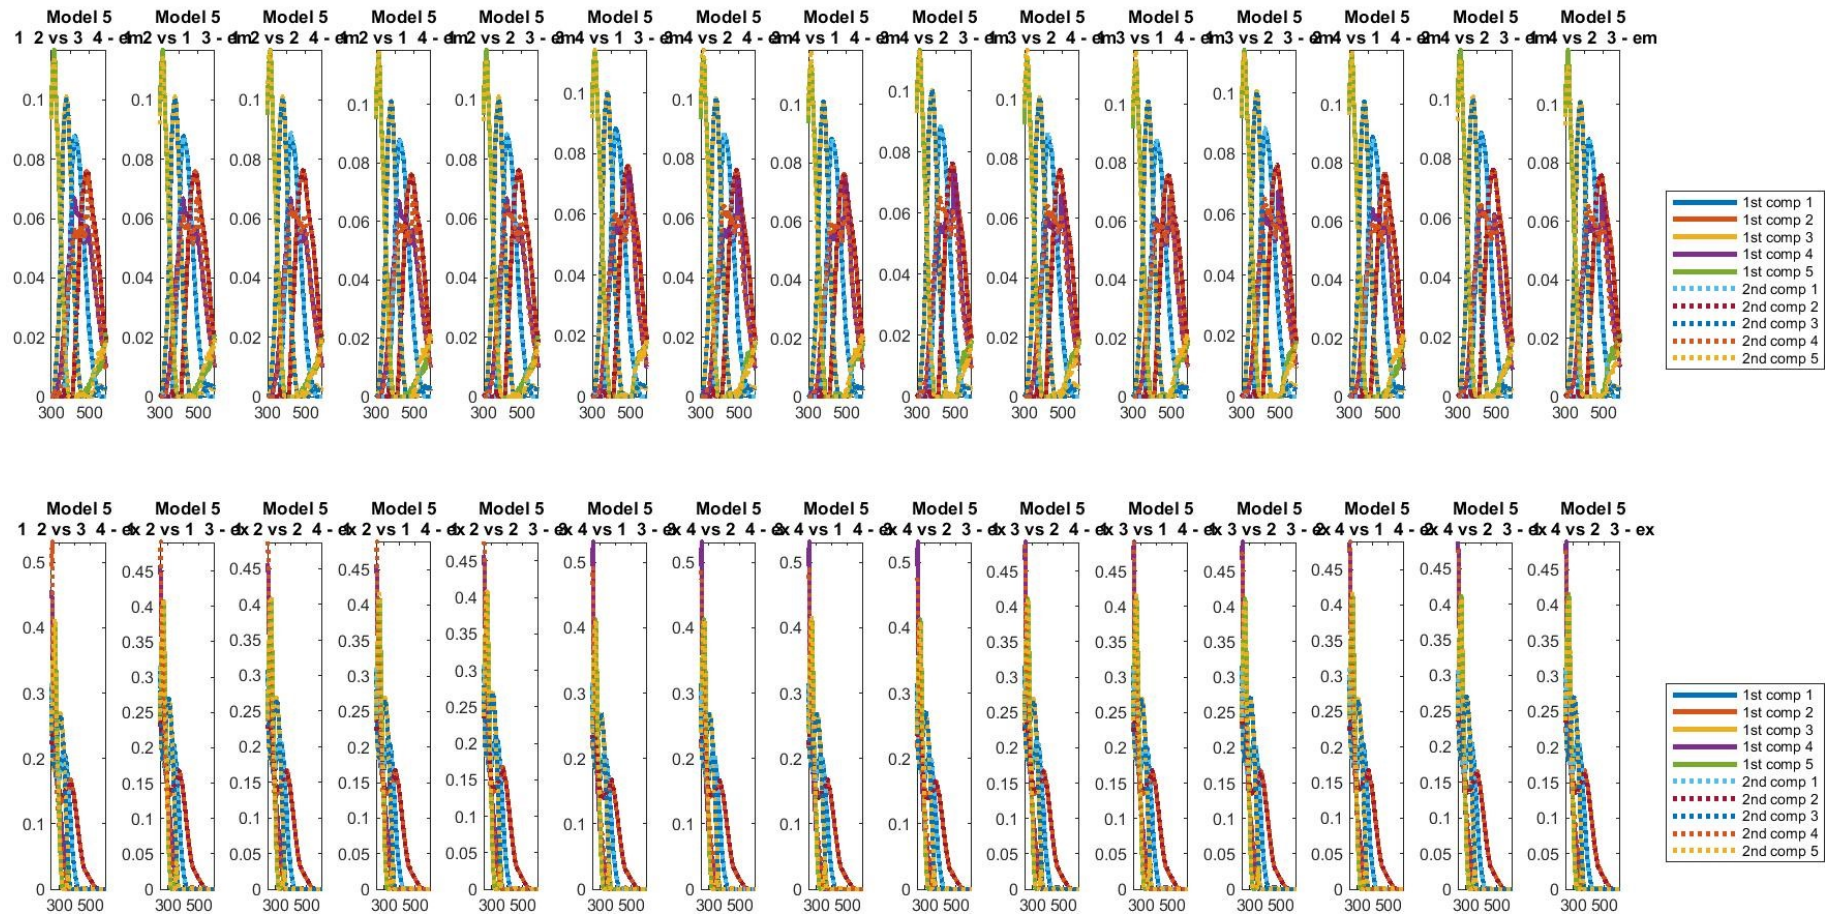

**Fig. A1.3b** Comparison of the emission fluorescence signal in 30 combinations of the splits for each identified fluorescence components. This indicating similarity of the identified components in all six combinations.

**Fig. A1.1** 3D Contour plots and 2D diagram of the five fluorescence EEM components identified

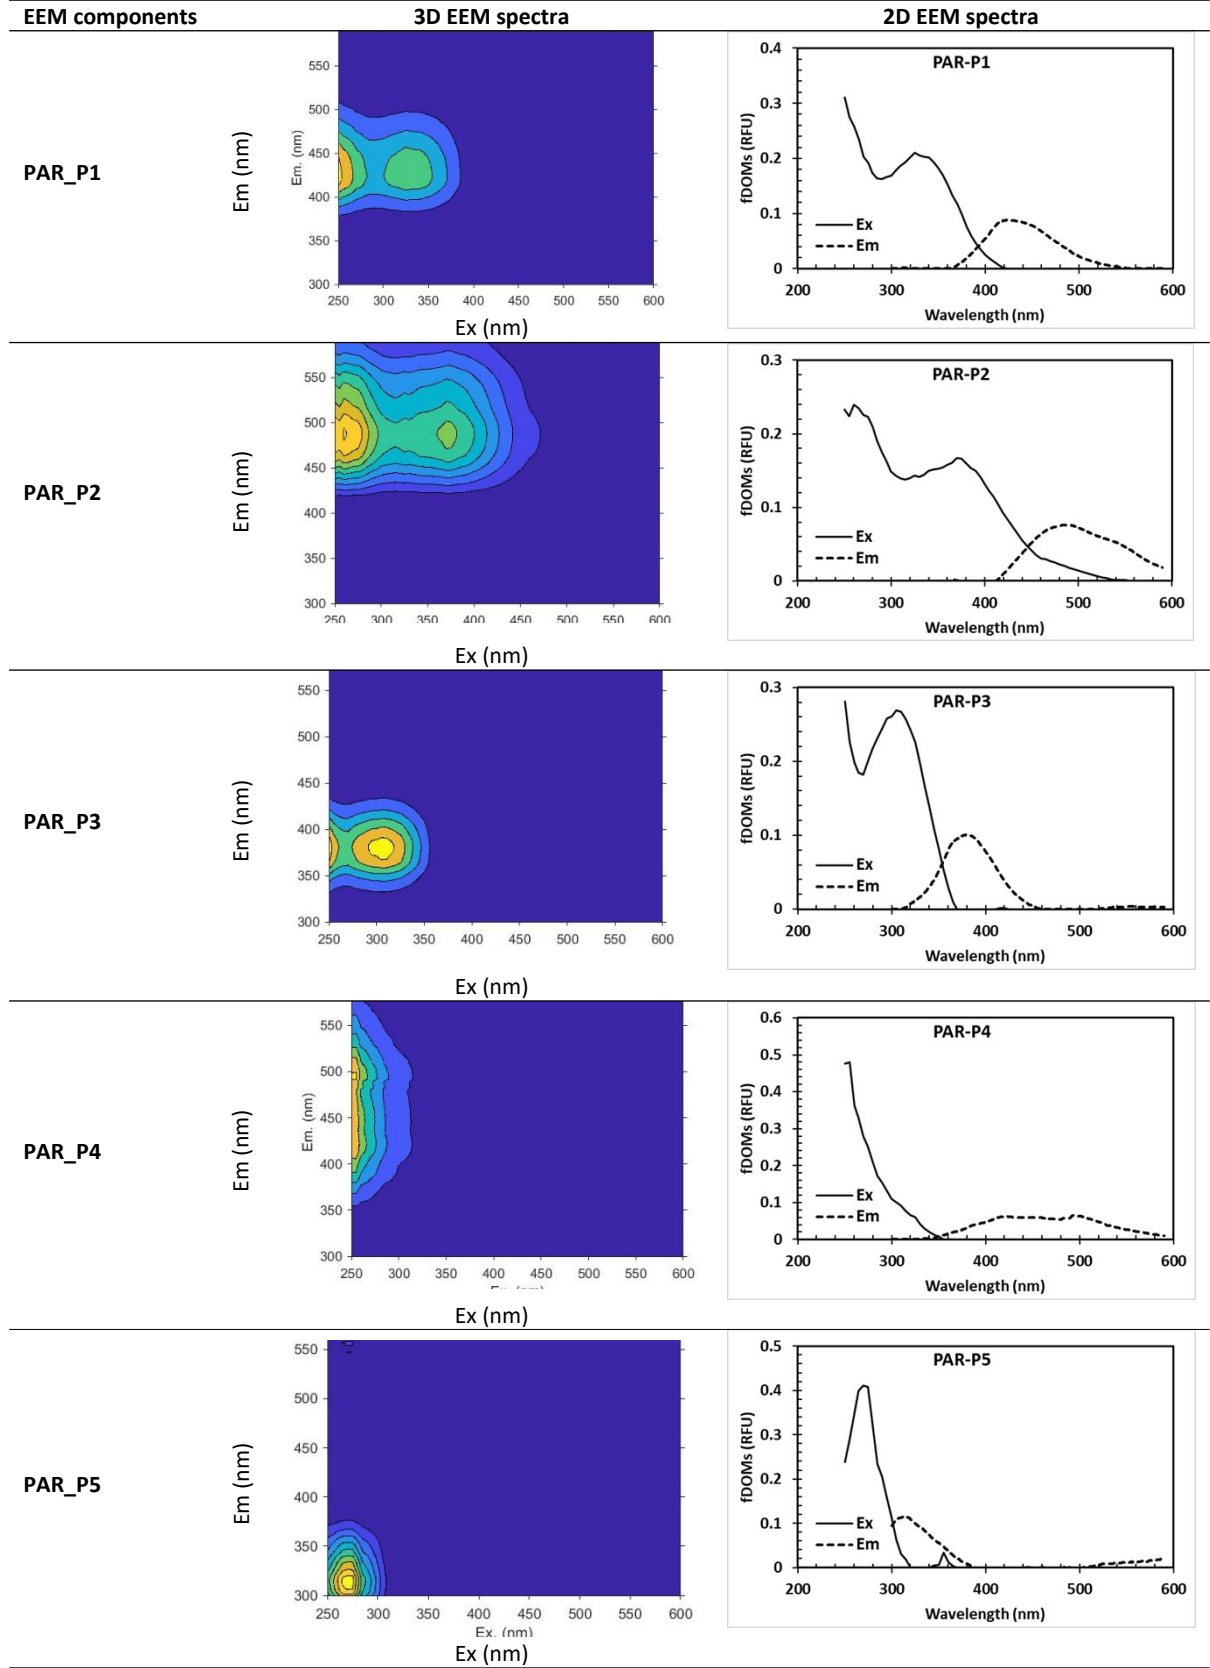

5-component models exhibiting no atypical spectral features<sup>8</sup>



R: Raw water sample, T: Treated water sample from Jar test 1 sample.

**Table A2.2b** Co-efficient of variation (CV) values of water quality analyses performed in triplicate for Murray River raw and treated (EC and CC) water samples

|                                   | Murray River water sample - Raw sample and Jar 1 treated sample |       |       |       |       |                |                          |                   |                   |       |        |             |                          |                   |                   |       |        |                |
|-----------------------------------|-----------------------------------------------------------------|-------|-------|-------|-------|----------------|--------------------------|-------------------|-------------------|-------|--------|-------------|--------------------------|-------------------|-------------------|-------|--------|----------------|
|                                   | Raw sample (R)                                                  |       |       |       |       |                | EC treated sample (EC T) |                   |                   |       |        |             | CC treated sample (CC T) |                   |                   |       |        |                |
|                                   | R1                                                              | R2    | R3    | M     | SD    | CV             | EC T <sub>1</sub>        | EC T <sub>2</sub> | EC T <sub>3</sub> | M     | SD     | CV          | CC T <sub>1</sub>        | CC T <sub>2</sub> | CC T <sub>3</sub> | M     | SD     | CV             |
| <b>A<sub>254</sub></b>            | 0.221                                                           | 0.224 | 0.214 | 0.220 | 0.004 | <b>1.9</b>     | 0.065                    | 0.065             | 0.066             | 0.065 | >0.001 | <b>0.7</b>  | 0.052                    | 0.052             | 0.051             | 0.052 | >0.001 | <b>0.9</b>     |
| <b>True colour (HU)</b>           | 45                                                              | 53    | 40    | 46.0  | 5.55  | <b>12.1</b>    | 6                        | 7                 | 7                 | 6.7   | 0.61   | <b>9.1</b>  | 4                        | 5                 | 5                 | 5.0   | 0.35   | <b>7.1</b>     |
| <b>Tur. (NTU)</b>                 | 86.7                                                            | 87.8  | 86.6  | 87.0  | 0.5   | <b>0.6</b>     | 4.5                      | 3.9               | 5.9               | 4.8   | 0.8    | <b>17.6</b> | 3.0                      | 3.6               | 1.7               | 2.8   | 0.8    | <b>28.7</b>    |
| <b>pH</b>                         | 7.36                                                            | 7.38  | 7.40  | 7.38  | 0.02  | <b>0.2</b>     | 7.07                     | 7.07              | 7.13              | 7.09  | 0.03   | <b>0.4</b>  | 6.24                     | 6.31              | 6.39              | 6.31  | 0.06   | <b>1.0</b>     |
| <b>Cond. (µS cm<sup>-1</sup>)</b> | 255                                                             | 255   | 255   | 255   | <1.0  | <b>&lt;1.0</b> | -                        | -                 | -                 | -     | -      | -           | 239                      | 239               | 239               | 239   | >1     | <b>&gt;1.0</b> |

R: Raw water sample, T: Treated water sample from Jar test 1 sample.

**Table A2.3** Determination of co-efficient of variation (CV) values for standard jar and electro jar techniques, using Myponga River and Murray River water samples (performed in triplicate)

|                                          | Myponga River water sample |       |       |       |       |       |            |       |       |       |       |       | Murray River water sample |       |       |       |       |       |       |             |       |       |       |       |        |            |
|------------------------------------------|----------------------------|-------|-------|-------|-------|-------|------------|-------|-------|-------|-------|-------|---------------------------|-------|-------|-------|-------|-------|-------|-------------|-------|-------|-------|-------|--------|------------|
|                                          | EC                         |       |       |       |       |       | CC         |       |       |       |       |       | EC                        |       |       |       |       |       | CC    |             |       |       |       |       |        |            |
|                                          | Raw                        | EJ1   | EJ2   | EJ3   | M     | SD    | CV         | J1    | J2    | J3    | M     | SD    | CV                        | Raw   | EJ1   | EJ2   | EJ3   | M     | SD    | CV          | J1    | J2    | J3    | M     | SD     | CV         |
| <b>A<sub>254</sub> (cm<sup>-1</sup>)</b> | 1.035                      | 0.126 | 0.134 | 0.134 | 0.131 | 0.004 | <b>2.9</b> | 0.136 | 0.137 | 0.138 | 0.137 | 0.001 | <b>0.6</b>                | 0.220 | 0.065 | 0.066 | 0.077 | 0.069 | 0.005 | <b>7.8</b>  | 0.052 | 0.051 | 0.051 | 0.051 | <0.001 | <b>0.9</b> |
| <b>True colour (HU)</b>                  | 199                        | 11    | 13    | 10    | 11.5  | 0.93  | <b>8.1</b> | 10    | 10    | 10    | 10.0  | 0.35  | <b>3.5</b>                | 46    | 4     | 7     | 5     | 5.50  | 0.93  | <b>17.0</b> | 5.2   | 4.5   | 5.2   | 5.00  | 0.35   | <b>7.0</b> |

EC: Electro-coagulation; CC: Chemical coagulation; J: Jar test, EJ: electro jar test

## References

1. T. Ohno, Fluorescence inner-filtering correction for determining the humification index of dissolved organic matter, *Environmental Science & Technology*, 2002, **36**, 742-746.
2. A. Huguet, L. Vacher, S. Relexans, S. Saubusse, J.-M. Froidefond and E. Parlanti, Properties of fluorescent dissolved organic matter in the Gironde Estuary, *Organic Geochemistry*, 2009, **40**, 706-719.
3. P. G. Coble, in *Subsea Optics and Imaging*, Elsevier, 2013, pp. 98-118.
4. A. M. Hansen, T. E. Kraus, B. A. Pellerin, J. A. Fleck, B. D. Downing and B. A. Bergamaschi, Optical properties of dissolved organic matter (DOM): Effects of biological and photolytic degradation, *Limnology and Oceanography*, 2016, **61**, 1015-1032.
5. J. R. Helms, A. Stubbins, E. M. Perdue, N. W. Green, H. Chen and K. Mopper, Photochemical bleaching of oceanic dissolved organic matter and its effect on absorption spectral slope and fluorescence, *Marine Chemistry*, 2013, **155**, 81-91.
6. P. G. Coble, Characterization of marine and terrestrial DOM in seawater using excitation-emission matrix spectroscopy, *Marine chemistry*, 1996, **51**, 325-346.
7. R. G. Zepp, W. M. Sheldon and M. A. Moran, Dissolved organic fluorophores in southeastern US coastal waters: correction method for eliminating Rayleigh and Raman scattering peaks in excitation–emission matrices, *Marine chemistry*, 2004, **89**, 15-36.
8. K. R. Murphy, C. A. Stedmon, D. Graeber and R. Bro, Fluorescence spectroscopy and multi-way techniques. PARAFAC, *Analytical Methods*, 2013, **5**, 6557-6566.
9. K. R. Murphy, C. A. Stedmon, P. Wenig and R. Bro, OpenFluor- an online spectral library of auto-fluorescence by organic compounds in the environment, *Analytical Methods*, 2014, **6**, 658-661.
10. K. R. Murphy, C. A. Stedmon, P. Wenig and R. Bro, OpenFluor—an online spectral library of auto-fluorescence by organic compounds in the environment, *Analytical Methods*, 2014, **6**, 658-661.
11. T. Lambert, C. R. Teodoru, F. C. Nyoni, S. Bouillon, F. Darchambeau, P. Massicotte and A. V. Borges, Along-stream transport and transformation of dissolved organic matter in a large tropical river, *Biogeosciences*, 2016, **13**, 2727-2741.
12. Y. Shutova, A. Baker, J. Bridgeman and R. K. Henderson, Spectroscopic characterisation of dissolved organic matter changes in drinking water treatment: From PARAFAC analysis to online monitoring wavelengths, *Water research*, 2014, **54**, 159-169.
13. C. L. Osburn, N. J. Anderson, C. A. Stedmon, M. E. Giles, E. J. Whiteford, T. J. McGenity, A. J. Dumbrell and G. J. Underwood, Shifts in the source and composition of dissolved organic matter in Southwest Greenland lakes along a regional hydro-climatic gradient, *Journal of Geophysical Research: Biogeosciences*, 2017, **122**, 3431-3445.
14. M. Groeneveld, N. Catalán, K. Attermeyer, J. Hawkes, K. Einarsdóttir, D. Kothawala, J. Bergquist and L. Tranvik, Selective adsorption of terrestrial dissolved organic matter to inorganic surfaces along a boreal inland water continuum, *Journal of Geophysical Research: Biogeosciences*, 2020, **125**, e2019JG005236.
15. D. Graeber, J. Gelbrecht, M. T. Pusch, C. Anlanger and D. von Schiller, Agriculture has changed the amount and composition of dissolved organic matter in Central European headwater streams, *Science of the Total Environment*, 2012, **438**, 435-446.
16. S. A. Walker, R. M. Amon, C. Stedmon, S. Duan and P. Louchouart, The use of PARAFAC modeling to trace terrestrial dissolved organic matter and fingerprint water masses in coastal Canadian Arctic surface waters, *Journal of Geophysical Research: Biogeosciences*, 2009, **114**.

17. S. Wang, M. Matt, B. L. Murphy, M. Perkins, D. A. Matthews, S. D. Moran and T. Zeng, Organic micropollutants in New York lakes: A statewide citizen science occurrence study, *Environmental Science & Technology*, 2020, **54**, 13759-13770.
18. M. Wauthy, M. Rautio, K. S. Christoffersen, L. Forsström, I. Laurion, H. L. Mariash, S. Peura and W. F. Vincent, Increasing dominance of terrigenous organic matter in circumpolar freshwaters due to permafrost thaw, *Limnology and Oceanography Letters*, 2018, **3**, 186-198.
19. N. M. Peleato, M. McKie, L. Taylor-Edmonds, S. A. Andrews, R. L. Legge and R. C. Andrews, Fluorescence spectroscopy for monitoring reduction of natural organic matter and halogenated furanone precursors by biofiltration, *Chemosphere*, 2016, **153**, 155-161.
