# Supplementary material for: Enhanced electrocoagulation process for natural organic matter removal from surface drinking water sources: coagulant dose control & organic matter characteristics
Source: Royal Society of Chemistry journal article supplement (doi:10.1039/d2ew00376g), 2022-11-08
Supplement: d2ew00376g2.xlsx [file d2ew00376g2.xlsx]

## Sheet: ICP OES detector
Sample	Al 394.401R (mg/L)	Ag 338.289 (mg/L)	As 188.979 (mg/L)	B 249.677 (mg/L)	Ba 455.403 (mg/L)	Be 313.107 (mg/L)	Ca 317.933R (mg/L)	Cd 214.440 (mg/L)	Co 228.616 (mg/L)	Cr 267.716R (mg/L)	Cu 324.752R (mg/L)	Fe 238.204 (mg/L)	K 766.490R (mg/L)	Mg 279.077R (mg/L)	Mn 257.610R (mg/L)	Mo 203.845 (mg/L)	Na 589.592R (mg/L)	Ni 231.604 (mg/L)	P 214.914 (mg/L)	P 178.221 (mg/L)	Pb 220.353 (mg/L)	S 180.669 (mg/L)	Sb 206.836 (mg/L)	Sb 217.582 (mg/L)	Se 196.026 (mg/L)	Si 251.611 (mg/L)	Sr 460.733R (mg/L)	Ti 336.121R (mg/L)	V 290.880 (mg/L)	Zn 206.200R (mg/L)	U 409.014 (mg/L)	Pb 283.306 (mg/L)
Blank	0.000533606	0.115415	0.0314053	0.0583509	0.00487906	0.00372869	0.0228524	0.00745919	0.00349767	0.0107375	0.00841759	0.00637529	0.0787404	-0.00242417	0.00872904	0.0735261	-0.107085	0.00508866	0.0195165	0.00615471	0.0108115	-0.554007	0.0372619	0.0536017	0.0108549	-0.0883129	-0.00211404	0.0165673	0.0042179	0.0161337	0.000317673	0.0114707
Murray River (Raw)	-0.022222	-0.000144213	0.00650948	0.0250214	0.0242106	5.04351e-05	7.69676	0.000704594	0.000604476	0.00439083	-0.000336494	-0.000137287	2.2699	6.35861	-7.70665e-05	0.00523691	33.3728	-0.000738158	0.033371	0.0166353	0.00366001	4.59117	0.00711707	0.00809738	-0.00121708	0.107967	0.0751998	-0.000469901	-0.00898483	0.00168247	-0.00783195	-0.0538869
En-EC Murray River (100%)	-0.0666542	0.000897634	0.00277193	0.0272908	0.0289391	3.37029e-05	8.14887	0.000683652	0.000290863	0.00289956	0.000635894	-0.00349011	2.46225	6.4534	0.00997738	0.00372818	34.2427	0.000338557	0.00293534	1.5623e-05	0.0107097	16.5073	0.00831416	0.0163421	0.00173388	0.101082	0.0814576	-0.000743211	-0.00859887	0.00228621	-0.00219561	-0.0667987
En-EC Murray River (250%)	0.967306	0.00191392	0.00382728	0.0315818	0.0283419	2.22145e-05	8.0163	0.00111909	0.000884934	0.00185237	-0.00119506	-0.00193605	2.5792	5.89125	0.00792888	0.00543244	33.7369	0.000489831	0.0381666	-0.00318304	0.00352599	18.5177	0.0124038	0.0135302	-0.0171224	0.070245	0.100277	-0.000951436	-0.0081879	0.0024257	-0.00995632	-0.054367
En-C Murray River (100%)	-0.0197257	0.0030617	0.006313	0.0255865	0.0239947	3.99162e-05	6.69684	0.00167992	0.000229206	0.00060706	-0.000939488	-0.00424193	2.36493	5.58746	0.000420807	0.00298877	36.4071	-0.000181718	0.0151614	-0.00564935	0.0070413	17.6856	0.000635948	0.0104932	-0.0016461	0.184189	0.0844614	-0.000316462	-0.0075142	0.00348997	0.00146251	-0.054117
En-C Murray River (250%)	-0.0182533	0.00202601	0.00681032	0.0317243	0.0258581	5.88409e-05	6.85655	0.00254469	0.000628817	0.00382301	0.000740202	-0.00327387	2.10905	5.80971	0.000191812	0.0085055	45.1812	0.000445325	0.0365525	0.00759885	0.00617132	25.7307	0.00319759	0.00386499	0.00114065	0.195253	0.0859456	-0.000138383	-0.00819446	0.00930122	0.00300122	-0.0651416
Myponga River (Raw)	-0.0198091	0.00208552	0.00186895	0.026145	0.0167759	5.83818e-05	12.3862	0.00018066	0.000240173	0.00189969	0.0011693	0.261087	4.05249	13.0188	0.000204965	0.00236495	73.8231	0.000750195	0.0336466	0.0790733	-0.000907447	4.50349	-0.00306885	-0.00129955	-0.00891948	4.42871	0.0681073	-0.000735686	-0.0168062	0.0016063	-0.00673412	-0.137184
En-EC Myponga River (100%)	-0.047311	0.00180532	0.00376276	0.0246292	0.0274988	-8.57438e-06	13.3325	0.000445307	-1.69673e-05	0.00123993	-0.00126561	-0.0032191	17.4361	12.4555	0.0138318	0.0042957	75.6937	-0.000512562	0.0697103	0.00854782	0.000111905	18.4288	0.00320314	0.00527483	-0.0189008	3.42658	0.0910523	-0.00129909	-0.015993	0.0102966	-0.0105319	-0.129212
En-EC Myponga River (250%)	-0.047273	0.00161939	0.00337676	0.0285828	0.0211053	-4.86271e-05	12.8858	0.000183471	-0.000244062	0.00285343	0.00170573	-0.0035513	4.37883	10.3117	0.00783314	0.00315733	78.5552	5.08299e-05	0.0497417	0.00608938	0.0015318	18.7247	0.000829517	0.0116863	-0.00174333	1.47393	0.0873323	-0.00144313	-0.0132864	0.00339439	-0.00324017	-0.101232
En-C Myponga River (100%)	-0.0189374	0.000232028	0.0038812	0.00393962	0.00184044	3.5577e-05	1.35161	0.000443506	0.000524283	0.00142235	-0.00270953	0.0762165	0.414609	1.34899	-4.47461e-05	0.00241022	7.83466	4.53812e-05	0.0230853	0.00315066	-0.00233684	-0.0865779	0.00151645	0.0191289	-0.00498975	0.428064	0.00648806	-0.00096878	-0.00159111	0.000201232	0.000164757	-0.00671576
En-C Myponga River (250%)	-0.0316862	0.0030802	0.00064626	0.0272091	0.0191804	-5.67275e-06	11.8172	0.00152291	0.00043261	0.00257224	0.00179837	-0.00308021	3.78597	11.7731	0.000697208	0.0040353	127.509	-0.000919279	0.031819	0.00408329	-0.00369835	62.0126	0.00316321	0.0189406	0.00683307	2.67984	0.0743704	-0.00131378	-0.015267	0.00688124	-0.00197876	-0.106347
Middle River (Raw)	-0.0886588	0.00167558	0.00238532	0.124516	0.0320139	2.81859e-05	35.1565	0.00021587	0.000335766	0.00375611	-0.00170781	0.0669374	16.686	33.6776	0.00373167	0.00360088	134.734	-0.000547679	0.0698637	0.223858	0.00151152	30.1369	0.00159802	-0.000382142	0.0290918	4.74664	0.29613	-0.00179003	-0.0392159	0.00044662	-0.00855471	-0.352584
En-EC Middle River (100%)	-0.069553	0.00230916	0.00184359	0.129291	0.0362119	-3.54692e-05	34.9023	0.000107436	0.000891167	-0.00109722	-0.000225849	-0.00295364	16.9946	32.316	0.109374	0.0021039	136.831	0.00175709	0.0455186	0.0733066	0.00184786	72.7035	-0.00830511	-0.00384063	0.00956547	4.03197	0.278049	-0.0014479	-0.0365448	0.00174536	-0.0130973	-0.328402
En-EC Middley River (250%)	-0.0471823	0.00286569	0.00339056	0.126551	0.0346847	-7.88822e-06	34.2301	0.000319637	0.0013524	0.00309611	0.00109699	-0.00275198	17.5646	28.6154	0.0840363	0.00241433	138.449	0.00143214	0.0189561	0.0556001	0.00219417	72.9341	0.00103265	-0.0094499	-0.00833799	3.21152	0.274966	-0.00221085	-0.0347855	0.00391819	-0.010654	-0.309375
En-C Middle River (100%)	-0.0388526	0.000396549	-0.000145511	0.0987923	0.0249639	-4.00708e-05	22.4696	0.000727072	3.83856e-05	0.00203402	0.00231472	-0.00229631	11.3422	25.4714	0.00780483	0.00470203	114.379	0.000722578	0.0161472	0.0434851	-0.00186306	42.1438	0.00644929	0.00131331	-0.00579832	6.39462	0.178256	-0.00139777	-0.0292099	0.00581148	-0.00484791	-0.245161
En-C Middle River (250%)	-0.0612021	-2.46085e-05	0.00334881	0.103278	0.028809	-3.83244e-05	23.7836	0.00119696	0.000971588	0.000764025	0.00327779	-0.00222602	13.345	26.9902	0.0138902	0.00417184	121.754	0.000270179	0.0228435	0.058146	0.00460651	57.2987	0.00433206	0.00171534	-0.00328189	6.62493	0.198906	-0.00114377	-0.0323027	0.00717822	-0.000814139	-0.260294

## Sheet: ICP MS detector
	27 -> 27 Al [ He ]			11 -> 11 B [ O2 ]			24 -> 24 Mg [ H2 ]			28 -> 28 Si [ H2 ]			31 -> 47 P [ O2 ]			39 -> 39 K [ He ]			40 -> 40 Ca [ H2 ]			52 -> 52 Cr [ He ]			55 -> 55 Mn [ He ]			56 -> 56 Fe [ H2 ]			59 -> 59 Co [ He ]			60 -> 60 Ni [ He ]			65 -> 65 Cu [ He ]			66 -> 66 Zn [ He ]			75 -> 91 As [ O2 ]			78 -> 78 Se [ H2 ]			95 -> 95 Mo [ He ]
Comment	Conc. [ ug/l ]	CPS	CPS RSD	Conc. [ ug/l ]	CPS	CPS RSD	Conc. [ ug/l ]	CPS	CPS RSD	Conc. [ ug/l ]	CPS	CPS RSD	Conc. [ ug/l ]	CPS	CPS RSD	Conc. [ ug/l ]	CPS	CPS RSD	Conc. [ ug/l ]	CPS	CPS RSD	Conc. [ ug/l ]	CPS	CPS RSD	Conc. [ ug/l ]	CPS	CPS RSD	Conc. [ ug/l ]	CPS	CPS RSD	Conc. [ ug/l ]	CPS	CPS RSD	Conc. [ ug/l ]	CPS	CPS RSD	Conc. [ ug/l ]	CPS	CPS RSD	Conc. [ ug/l ]	CPS	CPS RSD	Conc. [ ug/l ]	CPS	CPS RSD	Conc. [ ug/l ]	CPS	CPS RSD	Conc. [ ug/l ]
Murray River (Raw)	22.03	27512.8	8	24.686	35343.7	1	6522.41	1.22718e+08	1.1	245.273	2.40229e+06	1.1	0.197	4655.59	5.1	2701.81	4.75574e+06	6	8261.72	2.73932e+08	1.2	0.114	12457.3	9.3	0.053	2048.92	9.7	2.845	472172	1.6	0.006	1314.76	5.8	0.574	9699.45	6.6	1.523	80340.3	5.4	<0.000	9352.18	5.7	0.449	3413.92	7.3	0.15	253.6	12.1	0.237
Middle River (Raw)	18.548	23760.2	2.5	164.818	171194	0.9	32899.6	6.18897e+08	0.7	5343.34	4.64001e+07	0.8	43.067	71455.8	2.9	19092.5	3.27913e+07	4.4	33393.4	1.10439e+09	0.4	0.353	16337.7	8.8	3.473	49573.8	40.3	77.964	4.65398e+06	7.9	0.944	24819.8	7.9	1.749	17266.4	3.2	3.538	97175.5	7.7	<0.000	9121.92	3.2	1.123	8327.34	3.5	0.861	1187.95	7.6	2.322
En-EC Murray River (100%)	14.235	19113.3	3	22.403	33130.4	3.2	6456.86	1.21485e+08	1.3	250.285	2.44555e+06	1.1	<0.000	1621.78	3.9	2709.07	4.76816e+06	6.2	8680.74	2.87778e+08	2.4	0.105	12297	7.4	12.848	179812	6.3	<0.000	306024	0.7	0.036	2072.28	5.4	0.498	9208.63	4.2	0.982	75819.8	5.3	<0.000	14290.6	4.9	0.179	1444.9	5.6	0.112	203.55	7.5	0.233
En-EC Murray River (250%)	1196.15	1.29269e+06	8.8	22.038	32776.3	0.4	5724.64	1.07711e+08	1.1	203.863	2.04491e+06	2.6	<0.000	1665.18	23.8	2878.56	5.05807e+06	5.9	8344.78	2.76677e+08	1.1	0.135	12784.6	9.2	9.938	139385	6	1.161	378441	2.3	0.033	1995.53	2	0.425	8737.93	5.4	0.523	71989.3	6	<0.000	14821.7	5.9	0.176	1428.21	3.5	0.117	210.22	33.3	0.286
En-EC Murray River (250%)	145.054	160077	5	<0.000	9996.45	3.9	629.687	1.18705e+07	1	22.127	476475	1.2	<0.000	910.98	11.9	316.465	675723	5.5	837.857	2.86158e+07	1.6	0.099	12200.2	5.3	1.089	16447.9	5	1.5	397297	0.5	<0.000	991.07	2.7	<0.000	5720.24	4.2	0.773	74076.8	5.2	<0.000	13021.7	9.2	0.014	243.59	21.1	0.038	106.78	57.3	0.03
En-C Murray River (100%)	19.413	24692.3	5.1	20.155	30951.1	2.8	5545.1	1.04334e+08	2.4	351.685	3.32066e+06	0.2	<0.000	1451.58	10.2	2673.49	4.70731e+06	6.1	7067.62	2.34474e+08	1.1	0.062	11597.5	7	0.741	11612.5	2.9	<0.000	308087	1.9	<0.000	1111.19	22.1	0.661	10257	2.5	1.932	83756.6	8.3	1.891	23941	2.6	0.175	1421.55	8.8	0.112	203.55	14.2	0.258
En-C Murray River (100%)	12.841	17610.6	1.3	<0.000	10547.4	0.8	1461.91	2.75254e+07	2.2	575.747	5.25438e+06	0.4	<0.000	3464.04	9.7	506.772	1.00123e+06	4.8	1491.29	5.02081e+07	2.4	0.161	13222	6.3	0.394	6788.4	6	72.224	4.33441e+06	0.8	<0.000	884.28	12	0.092	6591.42	5.6	1.081	76647	8.5	<0.000	11943.1	4.3	0.046	480.51	4.2	0.056	130.14	58.1	0.038
En-C Murray River (250%)	12.816	17584.2	5.2	20.107	30904.4	0.9	5374.6	1.01127e+08	1	345.974	3.27137e+06	0.3	<0.000	1621.8	17.6	2297.61	4.06438e+06	5.4	6978.64	2.31534e+08	2.6	0.033	11141.7	8.9	0.829	12838	6.2	<0.000	291748	1.1	0.034	2015.55	10.5	0.837	11392.2	8	1.851	83079.1	7.4	8.158	49640.3	3.3	0.223	1765.27	2.7	0.18	293.64	5.2	0.34
En-C Murray River (250%)	10.785	15395.9	3.9	23.365	34063.2	1.1	5956.85	1.12079e+08	2.4	371.486	3.49155e+06	1.3	<0.000	1555.03	6.4	2536.47	4.47294e+06	5.1	7361.64	2.4419e+08	2.7	0.075	11809.4	6.6	0.886	13632.8	3.6	0.167	323112	3.2	0.027	1825.33	9.9	0.922	11939.7	6.8	2.004	84362.8	3.7	8.745	52049.7	3.6	0.196	1568.39	13.3	0.102	190.2	29.3	0.125
Myponga River (Raw)	8.207	12617.5	6.8	<0.000	10160	6.3	1356.23	2.55374e+07	0.3	518.104	4.7569e+06	0.6	<0.000	3544.16	7.3	482.092	959020	5.1	1355.15	4.57093e+07	1.1	0.123	12600.9	8	0.177	3774.34	9.3	34.863	2.25457e+06	1.5	0.011	1428.22	5.8	0.026	6170.86	10.2	0.844	74670.1	9	<0.000	10517.4	4.6	0.046	477.17	15.7	0.053	126.8	22.8	0.063
Myponga River (Raw)	46.694	54089.1	4	28.435	38978.1	4.5	13122.8	2.46878e+08	1	5001.6	4.34508e+07	0.7	12.405	23677.9	9.5	4675.33	8.13136e+06	6.3	13359.4	4.42383e+08	1	0.88	24906.6	7.5	0.852	13161.9	9	209.857	1.19963e+07	3	0.141	4705.54	7.6	1.824	17750.7	6	2.375	87459.3	9.3	0.845	19648	11.8	0.484	3667.57	9.3	0.244	377.07	19.9	0.176
En-EC Myponga River (100%)	11.83	16521.3	9.1	26.182	36794.4	2.6	12044.4	2.26591e+08	1.1	3829.86	3.33383e+07	1.3	<0.000	3237.01	4.7	19819.7	3.40351e+07	6.2	13897	4.60146e+08	0.8	0.121	12560.8	5.7	17.428	243443	5.8	0.443	338438	2	0.066	2813.17	10.8	0.481	9098.41	2.1	1.437	79625.8	6.5	10.132	57736.4	5.8	0.252	1982.19	8.3	0.137	236.92	31.7	0.166
En-EC Myponga River (100%)	1.896	5817.01	13.1	<0.000	9799.61	1.1	1308.9	2.46472e+07	1.8	403.318	3.76627e+06	0.8	<0.000	1061.15	17.5	2159.99	3.82898e+06	7.3	1399.92	4.71887e+07	0.4	0.036	11178.5	7.3	1.897	27670.1	6.7	0.948	366580	1.5	<0.000	860.92	15.1	<0.000	5002.58	9.5	0.341	70465.4	6.8	<0.000	13632.7	4.8	0.014	246.93	15.3	<0.000	53.39	21.7	0.013
En-EC Myponga River (100%)	2.543	6514.63	6.7	<0.000	10283.6	1.5	1292.33	2.43354e+07	0.5	402.969	3.76325e+06	0.2	<0.000	910.99	10.5	2188.15	3.87715e+06	5	1398.77	4.71507e+07	0.3	0.074	11806.2	6	1.922	28024.3	6.2	1.199	380547	1	<0.000	941.01	9.7	<0.000	5279.64	9.5	0.709	73538	7.4	<0.000	14147	8.1	0.015	253.6	28.6	0.025	90.09	40.1	0.022
En-EC Myponga River (250%)	3.067	7078.74	4.9	<0.000	9699.32	2.9	1053.28	1.98388e+07	0.6	185.783	1.88887e+06	0.7	<0.000	1101.18	7.8	520.715	1.02508e+06	5.4	1391.4	4.69072e+07	0.3	0.07	11732.7	2	1.262	18846.1	3.2	2.397	447226	0.7	<0.000	1021.1	6.4	<0.000	5720.22	10.6	0.837	74606.7	9	<0.000	14407.5	5.6	0.014	246.92	11.7	0.033	100.11	52	0.11
En-EC Myponga River (250%)	3.711	7773.11	1.8	26.462	37065.3	3.3	10210.4	1.92093e+08	1.2	1730.68	1.52218e+07	1.5	<0.000	3707.59	7.2	5099.23	8.85642e+06	4.1	13580.7	4.49695e+08	0.5	0.223	14217	1.5	10.947	153408	4.7	0.206	325251	0.9	0.054	2526.15	9.3	0.625	10026.6	7.7	1.571	80745.8	7.3	3.207	29337.9	5.1	0.172	1394.85	14.4	0.147	250.26	4	0.087
En-C Myponga River (100%)	3.42	7459.29	9.3	<0.000	6908.55	7.7	138.962	2.63956e+06	0.8	54.769	758188	0.6	<0.000	1044.46	13.4	55.093	228658	3.8	137.305	5.46652e+06	0.3	0.093	12110.1	6.9	0.059	2132.34	6.5	10.307	887562	0.7	0.015	1545.01	12	<0.000	5072.66	5.6	0.877	74941.5	8.6	<0.000	10150.2	8.4	0.002	156.83	41	0.051	123.46	40	0.06
En-C Myponga River (250%)	3.776	7843.18	9.6	<0.000	9378.8	5.8	1188.03	2.23735e+07	1.2	338.564	3.20742e+06	0.7	<0.000	1004.42	25.1	435.119	878674	5.6	1260.99	4.25981e+07	0.3	0.089	12036.6	5.3	0.289	5326.36	2	2.965	478870	1.8	<0.000	884.28	1.7	<0.000	5903.83	6.8	0.976	75776.1	7.9	<0.000	13442.4	11.2	0.022	306.99	16.1	0.046	116.79	71.4	0.14
En-C Myponga River (250%)	7.02	11338.8	2.4	22.558	33280.9	1.4	11108.1	2.0898e+08	1.3	3195.71	2.78655e+07	1	<0.000	2956.68	10.7	4078.08	7.10979e+06	5.2	11947.3	3.95718e+08	1.9	0.069	11722.7	5.9	1.17	17566.9	8.5	0.283	329578	1.4	0.055	2546.18	8.1	1.177	13582.7	4	3.638	98009.6	6.2	7.54	47104.2	4.4	0.178	1441.56	6.2	0.089	173.52	41.7	0.123
Middle River (Raw)	3.658	7716.37	14.5	12.513	23542.7	1.7	3580.23	6.73729e+07	1.4	558.689	5.10717e+06	1	1.442	6594.94	3.2	1988.33	3535374	5.8	3688.84	1.22824e+08	0.7	0.051	11418.9	7.4	0.965	14728.1	0.8	7.603	737028	0.6	0.067	2833.18	10.6	0.001	6003.95	7.6	0.633	72904.6	7.2	<0.000	9762.82	3.8	0.11	947.69	12.8	0.051	123.46	73.1	0.159
En-EC Middle River (100%)	4.104	8197.07	7.2	12.623	23649.7	3.1	3431.09	6.45675e+07	0.9	481.294	4.43922e+06	0.6	<0.000	1067.81	2.4	1993.8	3.54473e+06	5.5	3673.94	1.22332e+08	0.8	0.072	11762.7	6.1	14.531	203202	4.7	1.17	378931	1.7	0.07	2916.63	2.3	<0.000	5593.38	9.2	0.554	72244.1	5.9	<0.000	9953.14	4.8	0.027	340.36	23.5	0.071	150.16	46.7	0.159
En-EC Middle River (100%)	11.774	16461.7	4.8	162.235	168690	0.8	32604.1	6.13339e+08	1.2	4552.98	3.95791e+07	0.6	0.174	4618.78	3.4	18955.1	3.25563e+07	7	35982	1.18993e+09	2.5	0.299	15459.5	8.7	159.709	2.2202e+06	3.8	1.148	377692	0.7	0.8	21198	3.4	1.172	13552.6	7.4	1.424	79516.2	8.2	1.033	20419.6	0.9	0.354	2723.05	0.6	0.383	560.6	6.2	0.897
En-EC Middley River (250%)	4.845	8994.97	10.9	12.478	23509.3	2.3	3101.07	5.83594e+07	1.8	388.991	3.64262e+06	2.3	<0.000	1174.6	21.9	2120.89	3.76211e+06	4.8	3600.76	1.19914e+08	1.6	0.106	12317.1	8.9	10.873	152379	4.6	1.514	398076	1.3	0.064	2773.12	5.7	<0.000	5910.47	9.8	0.69	73379.9	7.9	<0.000	10918.1	6.7	0.025	323.68	7.1	0.036	103.44	29.6	0.107
En-EC Middley River (250%)	15.66	20648.5	14.9	154.707	161392	1	29097.9	5.47384e+08	0.5	3671.28	3.19698e+07	1.5	0.039	4408.49	2.9	19740.9	3.39004e+07	6.5	35317.2	1.16796e+09	1.9	0.369	16591.7	4.8	118.399	1.64627e+06	5.5	5.911	642852	2.3	0.766	20359.5	6.3	1.035	12667.7	9.3	2.119	85321.5	5.5	2.167	25070.5	2	0.322	2486.12	3.1	0.218	343.7	6.1	0.639
En-C Middle River (100%)	2.376	6334.38	9.4	8.753	19898	2.5	2589.95	4.87449e+07	1.1	743.737	6.70418e+06	1.2	<0.000	1184.61	3	1388.02	2.50857e+06	6.2	2401.17	80274490	1.8	0.078	11873	7.5	1.178	17683.9	4.1	1.359	389434	0.9	0.053	2492.77	4.6	0.01	6067.37	8.3	1.351	78902.2	5.9	<0.000	14257.2	5.8	0.03	363.72	15.2	0.023	86.76	6.7	0.081
En-C Middle River (100%)	5.929	10163.4	10.3	123.203	130851	2.1	24433.3	4.59637e+08	2.4	7060.94	6.12235e+07	1.5	<0.000	4231.62	4.7	12952.4	2.22889e+07	5.5	23502.8	7.77563e+08	2	0.154	13101.7	10.1	10.82	151645	6	1.117	375988	1.8	0.569	15412.7	5.6	1.28	14247.2	9.3	6.489	121829	5.4	7.122	45391.5	5.2	0.356	2739.73	5	0.208	330.35	10.9	0.381
En-C Middle River (250%)	2.779	6768.32	4.7	8.688	19834.5	4.1	2728.93	5.13591e+07	3.2	751.118	6.76789e+06	2.5	<0.000	1007.76	16.3	1622.88	2.91029e+06	6.2	2559.71	8.55131e+07	2.5	0.048	11372.1	8.7	1.987	28930	5.3	0.734	354684	11.3	0.044	2252.5	10.9	0.001	6007.27	7.3	1.244	78011.1	8	<0.000	15335.9	4.7	0.026	333.69	30.3	0.013	73.41	7.9	0.09
En-C Middle River (250%)	8.72	13170	11.3	124.798	132396	2.4	25709.9	4.83653e+08	1.5	7205.09	6.24676e+07	0.7	<0.000	3527.37	5.8	14809	2.54645e+07	5.2	24871.1	8.22777e+08	0.6	0.111	12403.8	2.9	18.588	259568	4.8	2.152	433621	1.5	0.577	15606.4	5.4	1.094	13051.7	9.9	6.377	120893	6.9	12.738	68422.3	5.3	0.308	2385.99	15.9	0.127	223.57	25.5	0.312
[truncated: 11 more columns]
